# Supplementary material for: How water, temperature and seismicity control the preparation of massive rock slope failure (Hochvogel, DE/AT)
Source: Copernicus journal article supplement (doi:10.5194/egusphere-2024-231), 2024-02-16
Supplement: Supplementary file 1 [file egusphere-2024-231-supplement.pdf]

## S1 Measuring devices on summit

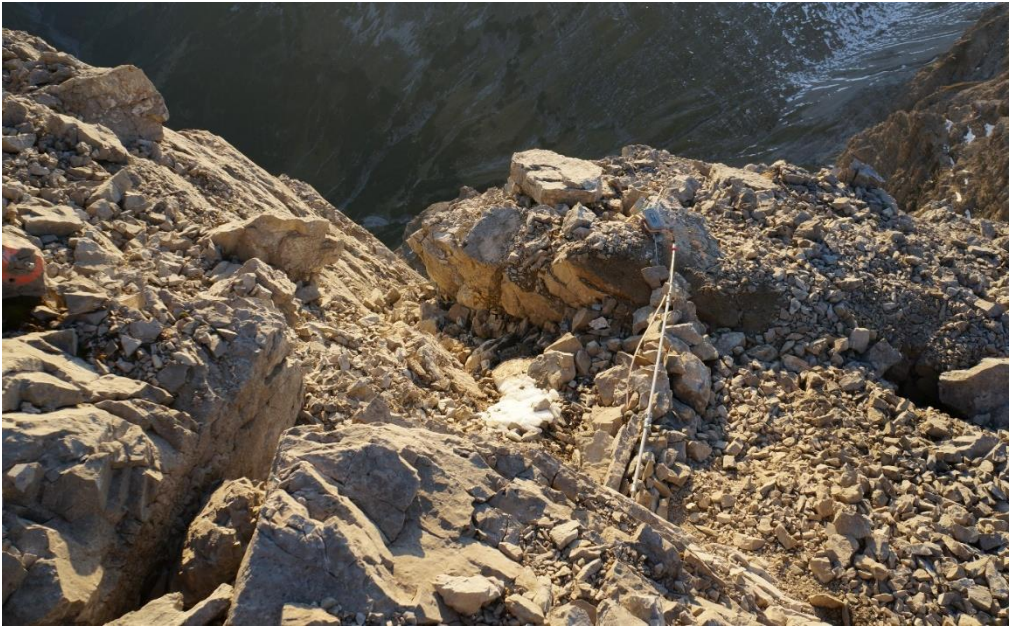

*Fig. S 1: Photo of vibrating wire crackmeter "Crack06" without its protective wood roof.*

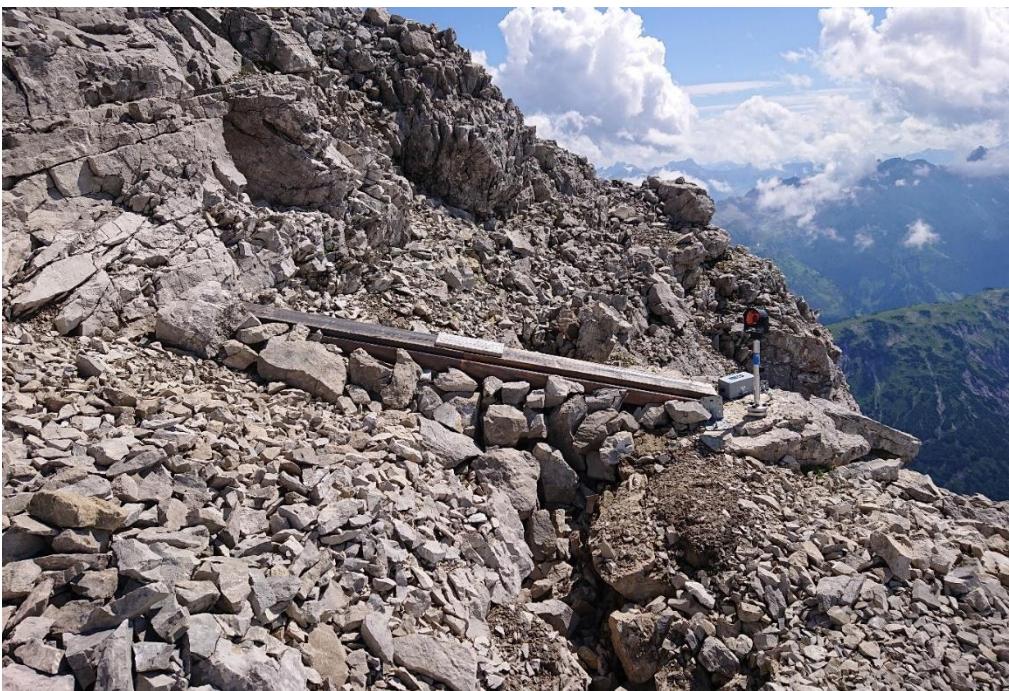

5 *Fig. S 2: Photo of vibrating wire crackmeter "Crack06" with wood roof.*

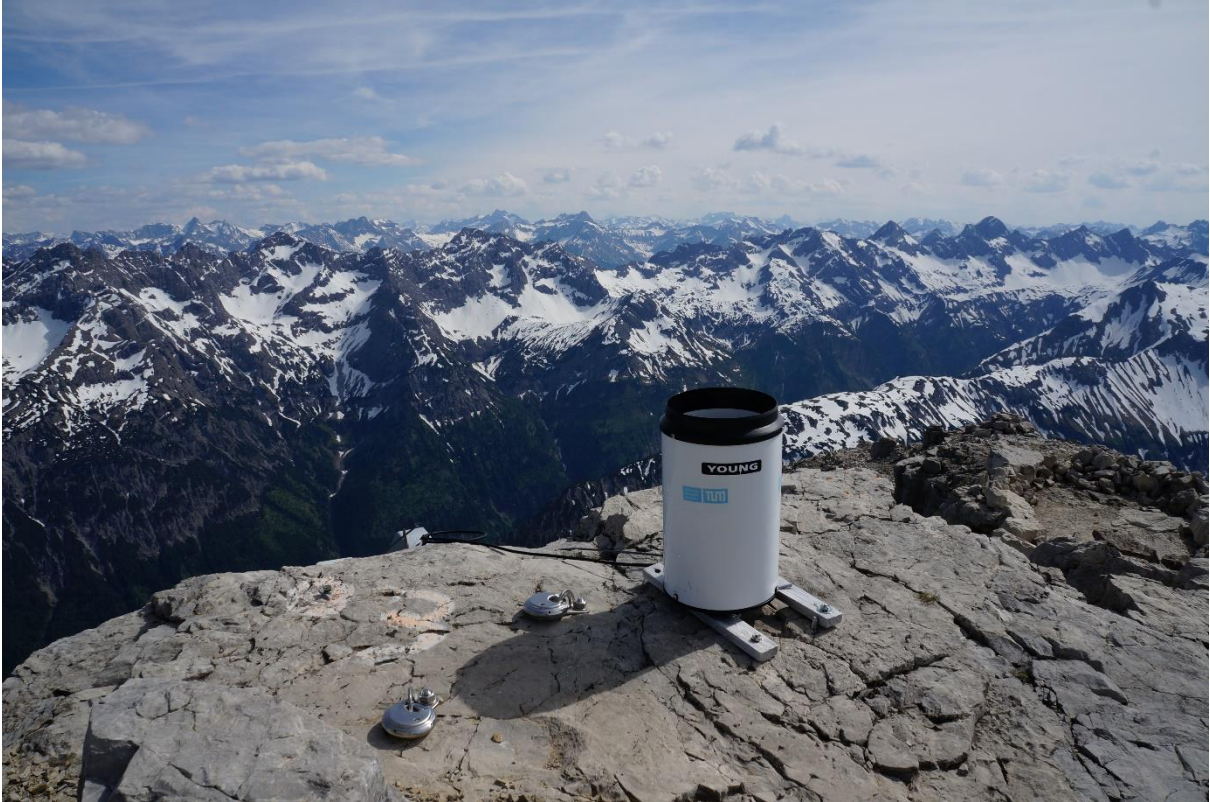

Fig. S 3: Photo of tipping bucket rain gauge on the summit of Hochvogel.

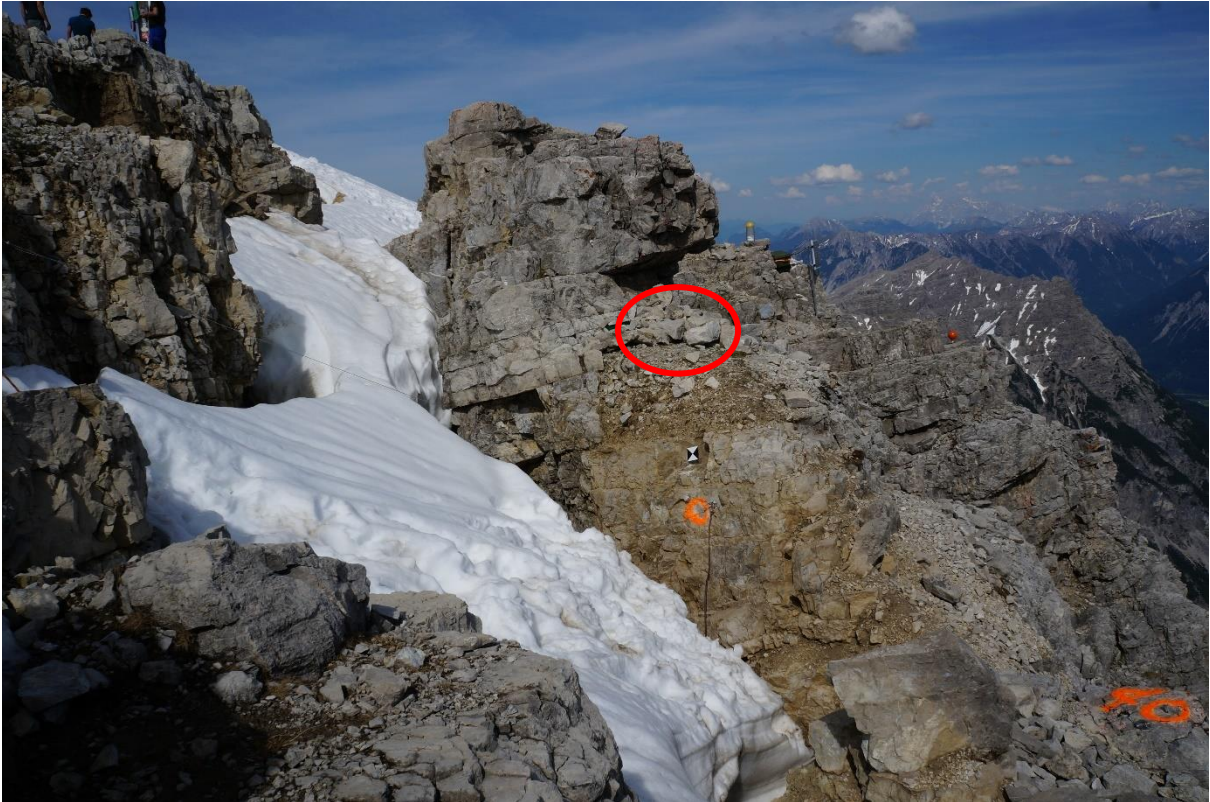

10 Fig. S 4: Photo of the main crack with position of seismic station HV<sub>1</sub> (red ellipse).

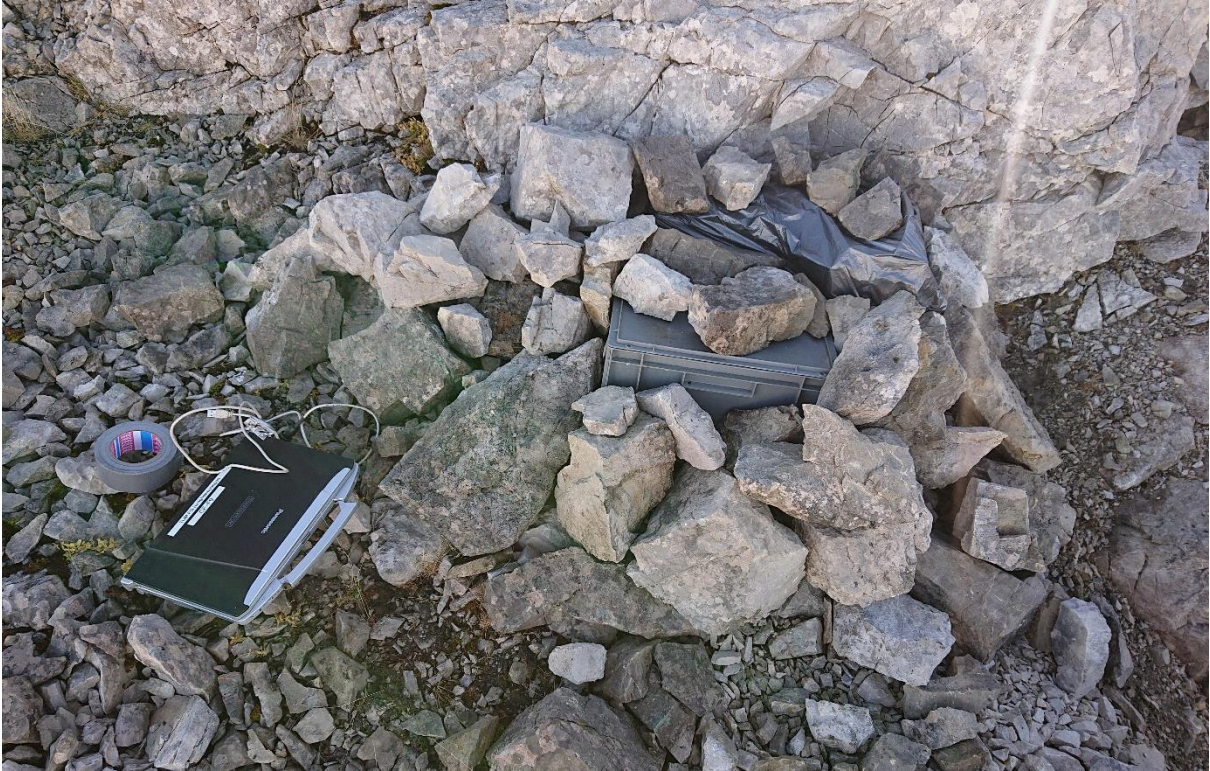

Fig. S 5: Photo of seismic station SA<sub>22</sub> during maintenance. During operation, the station is completely covered with rocks to protect the geophone from wind and rain.

15 Table S 1: Station info data for all used seismic stations.

| ID    | x        | y         | z    | Installation depth | Sensor type | Logger type | gain |
|-------|----------|-----------|------|--------------------|-------------|-------------|------|
| HVGL1 | 608448.5 | 5248421.2 | 2586 | 0                  | PE6B        | Cube3ext    | 32   |
| HVGL2 | 609674.9 | 5247154.4 | 1588 | 0.5                | TC120s      | Cube3extBOB | 4    |
| HVGL3 | 610726.5 | 5247060.3 | 1489 | 0.4                | TC120s      | Cube3extBOB | 4    |
| HVGL4 | 609216.5 | 5246298.4 | 1252 | 0.3                | TC120s      | Cube3extBOB | 4    |
| HVGL5 | 609620   | 5248034   | 1933 | 0.3                | PE6B        | Cube3ext    | 16   |
| SA_21 | 608433   | 5248426   | NA   | 0.4                | PE6B        | Cube3ext    | 16   |
| SA_22 | 608436   | 5248451   | NA   | 0                  | PE6B        | Cube3ext    | 32   |
| SA_23 | 608455   | 5248474   | NA   | 0.4                | PE6B        | Cube3ext    | 32   |

## S2 Snowmelt modelling configuration

20 [GENERAL]  
BUFFER\_SIZE = 370  
BUFF\_BEFORE = 1.5  
DATA\_QA\_LOGS = FALSE

25 [INPUT]  
COORDSYS = CH1903  
TIME\_ZONE = 1  
METEO = SMET  
METEOPATH = ./input

30 METEOPATH\_RECURSIVE = FALSE  
STATION1 = ZUGS1\_2021.smet  
SNOWPACK\_SLOPES = FALSE  
MERGE\_STRATEGY = EXPAND\_MERGE  
TSG::CREATE = CST

35 TSG::CST::VALUE = 273  
SNOW = SMET  
SNOWPATH = ./input  
SNOWFILE1 = ZUGS1

40 [OUTPUT]  
COORDSYS = CH1903  
TIME\_ZONE = 1  
METEO = SMET  
METEOPATH = ./output

45 WRITE\_PROCESSED\_METEO = FALSE  
EXPERIMENT = 2021  
USEREFERENCELAYER = FALSE  
SNOW\_WRITE = FALSE  
PROF\_WRITE = TRUE

50 PROF\_FORMAT = PRO  
AGGREGATE\_PRO = FALSE  
AGGREGATE\_PRF = FALSE  
PROF\_START = 0  
PROF\_DAYS\_BETWEEN = 0.041666

55 HARDNESS\_IN\_NEWTON = FALSE  
CLASSIFY\_PROFILE = FALSE  
TS\_WRITE = TRUE  
TS\_FORMAT = SMET  
TS\_START = 0

60 TS\_DAYS\_BETWEEN = 0.041666  
AVGSUM\_TIME\_SERIES = TRUE  
CUMSUM\_MASS = FALSE  
PRECIP\_RATES = TRUE  
OUT\_CANOPY = FALSE

65 OUT\_HAZ = FALSE  
OUT\_SOILEB = FALSE  
OUT\_HEAT = TRUE  
OUT\_T = TRUE  
OUT\_LW = TRUE

70 OUT\_SW = TRUE  
OUT\_MASS = TRUE  
OUT\_METEO = TRUE  
OUT\_STAB = TRUE

75

[SNOWPACK]  
CALCULATION\_STEP\_LENGTH = 15  
ROUGHNESS\_LENGTH = 0.002  
HEIGHT\_OF\_METEO\_VALUES = 5

80 HEIGHT\_OF\_WIND\_VALUE = 5  
ENFORCE\_MEASURED\_SNOW\_HEIGHTS = TRUE  
SW\_MODE = BOTH  
ATMOSPHERIC\_STABILITY = MO\_MICHLMAYR  
CANOPY = FALSE

85 MEAS\_TSS = TRUE  
CHANGE\_BC = TRUE  
THRESH\_CHANGE\_BC = -1  
SNP\_SOIL = FALSE

90 [SNOWPACKADVANCED]  
VARIANT = DEFAULT  
RESEARCH = TRUE  
ADJUST\_HEIGHT\_OF\_METEO\_VALUES = TRUE  
ADJUST\_HEIGHT\_OF\_WIND\_VALUE = TRUE

95 SNOW\_EROSION = TRUE  
WIND\_SCALING\_FACTOR = 1  
NUMBER\_SLOPES = 1  
PERP\_TO\_SLOPE = FALSE  
ALLOW\_ADAPTIVE\_TIMESTEPPING = TRUE

100 THRESH\_RAIN = 1.2  
FORCE\_RH\_WATER = TRUE  
THRESH\_RH = 0.5  
THRESH\_DTEMP\_AIR\_SNOW = 3  
HOAR\_THRESH\_TA = 1.2

105 HOAR\_THRESH\_RH = 0.97  
HOAR\_THRESH\_VW = 10  
HOAR\_DENSITY\_BURIED = 125  
HOAR\_MIN\_SIZE\_BURIED = 2  
HOAR\_DENSITY\_SURF = 100

110 MIN\_DEPTH\_SUBSURF = 0.07  
T\_CRAZY\_MIN = 210  
T\_CRAZY\_MAX = 340  
METAMORPHISM\_MODEL = DEFAULT  
NEW\_SNOW\_GRAIN\_SIZE = 0.3

115 STRENGTH\_MODEL = DEFAULT  
VISCOSITY\_MODEL = DEFAULT  
SALTATION\_MODEL = SORENSEN  
ENABLE\_VAPOUR\_TRANSPORT = FALSE  
WATERTRANSPORTMODEL\_SNOW = BUCKET

120 WATERTRANSPORTMODEL\_SOIL = BUCKET  
SOIL\_EVAP\_MODEL = EVAP\_RESISTANCE  
SOIL\_THERMAL\_CONDUCTIVITY = FITTED  
ALBEDO\_AGING = TRUE  
SW\_ABSORPTION\_SCHEME = MULTI\_BAND

125 HARDNESS\_PARAMETERIZATION = MONTI  
DETECT\_GRASS = FALSE  
PLASTIC = FALSE  
JAM = FALSE  
WATER\_LAYER = FALSE

130 HEIGHT\_NEW\_ELEM = 0.02  
MINIMUM\_L\_ELEMENT = 0.0025

COMBINE\_ELEMENTS = TRUE  
 TWO\_LAYER\_CANOPY = TRUE  
 CANOPY\_HEAT\_MASS = TRUE  
 135 CANOPY\_TRANSMISSION = TRUE  
 FORESTFLOOR\_ALB = TRUE  
 ADVECTIVE\_HEAT = FALSE

[INTERPOLATIONS1D]  
 140 ENABLE\_RESAMPLING = TRUE  
 WINDOW\_SIZE = 2419200

[FILTERS]  
 TA::FILTER1 = MIN\_MAX  
 145 TA::ARG1::MIN = 240

TA::ARG1::MAX = 320  
 HS::FILTER1 = MIN  
 HS::ARG1::SOFT = true  
 HS::ARG1::MIN = 0.0  
 150 RH::FILTER1 = MIN\_MAX  
 RH::ARG1::SOFT = TRUE  
 RH::ARG1::MIN = 0  
 RH::ARG1::MAX = 1  
 RH::ARG1::MIN\_RESET = 0  
 155 RH::ARG1::MAX\_RESET = 1  
 [TechSnow]  
 SNOW\_GROOMING = FALSE

160

### S3 Seasonal data analysis

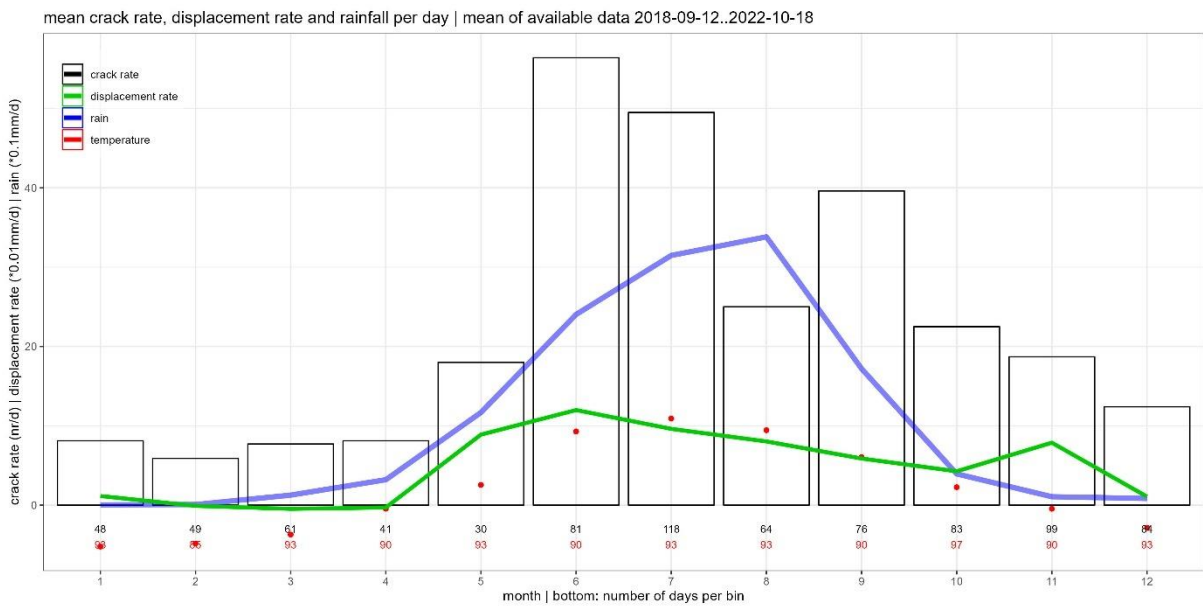

Fig. S 6: All available data averaged per month of the year. Note the generally higher values of all variables in the summer months (black bars: crack rate (events/d), green line: displacement rate (0.01mm/d), blue line: rain intensity (0.1mm/d), red dots: temperature (°C). The numbers in the bottom give the number of available data points per bin (black for cracks, red for other variables).

165

170 S4 Random Forest classifier

Table S 2: Features that have been used as input for the Random Forest classifier. Features 6-66 have been calculated for the station with the highest signal-to-noise ratio (SNR), once for the picked signal itself (prefix "pick\_") and once for a longer signal including 3 s buffer before and after the picked signal (prefix "long\_"), using the function "signal\_stats" from eseis.

| feature nr | name        | details                                                                                                        |
|------------|-------------|----------------------------------------------------------------------------------------------------------------|
| 1          | snr_min     | SNR of the station with the minimum SNR                                                                        |
| 2          | snr_max     | SNR of the station with the maximum SNR                                                                        |
| 3          | dur_mean    | mean signal duration of all stations that picked the signal                                                    |
| 4          | dur_diff    | duration difference between the minimum and the maximum signal duration of all stations that picked the signal |
| 5          | t_risefall  | ratio of rise to fall time                                                                                     |
| 6          | a_skewness  | Skewness of the signal amplitude                                                                               |
| 7          | a_kurtosis  | Kurtosis of the signal amplitude                                                                               |
| 8          | a1_kurtosis | Kurtosis of the filtered (0.1-1 Hz) signal amplitude                                                           |
| 9          | a2_kurtosis | Kurtosis of the filtered (1-3 Hz) signal amplitude                                                             |
| 10         | a3_kurtosis | Kurtosis of the filtered (3-10 Hz) signal amplitude                                                            |
| 11         | a4_kurtosis | Kurtosis of the filtered (10-20 Hz) signal amplitude                                                           |
| 12         | e_maxmean   | Ratio of maximum and mean envelope value, see Hibert et al. (2017)                                             |
| 13         | e_maxmedian | Ratio of maximum and median envelope value, see Hibert et al. (2017)                                           |
| 14         | e_skewness  | Skewness of the signal envelope                                                                                |
| 15         | e_kurtosis  | Kurtosis of the signal envelope                                                                                |
| 16         | e1_logsum   | Logarithm of the filtered (0.1-1 Hz) envelope sum, see Hibert et al. (2017)                                    |
| 17         | e2_logsum   | Logarithm of the filtered (1-3 Hz) envelope sum, see Hibert et al. (2017)                                      |
| 18         | e3_logsum   | Logarithm of the filtered (3-10 Hz) envelope sum, see Hibert et al. (2017)                                     |
| 19         | e4_logsum   | Logarithm of the filtered (10-20 Hz) envelope sum, see Hibert et al. (2017)                                    |
| 20         | c_peaks     | Number of peaks (excursions above 75)                                                                          |
| 21         | c_energy1   | Sum of the first third of the signal cross correlation function, see Hibert et al. (2017)                      |

|    |             |                                                                                               |
|----|-------------|-----------------------------------------------------------------------------------------------|
| 22 | c_energy2   | Sum of the last two thirds of the signal cross correlation function, see Hibert et al. (2017) |
| 23 | c_energy3   | Ratio of c_energy1 and c_energy2, see Hibert et al. (2017)                                    |
| 24 | s_peaks     | Number of peaks (excursions above 75)                                                         |
| 25 | s_peakpower | Mean power of spectral peaks, see Hibert et al. (2017)                                        |
| 26 | s_mean      | Mean spectral power, see Hibert et al. (2017)                                                 |
| 27 | s_median    | Median spectral power, see Hibert et al. (2017)                                               |
| 28 | s_max       | Maximum spectral power, see Hibert et al. (2017)                                              |
| 29 | s_var       | Variance of the spectral power, see Hibert et al. (2017)                                      |
| 30 | s_flatness  | Spectral flatness                                                                             |
| 31 | s_entropy   | Spectral entropy                                                                              |
| 32 | s_precision | Spectral precision                                                                            |
| 33 | s_sd        | Standard deviation of the spectral power                                                      |
| 34 | s_sem       | Standard error of the mean of the spectral power                                              |
| 35 | s1_energy   | Energy of the filtered (0.1-1 Hz) spectrum, see Hibert et al. (2017)                          |
| 36 | s2_energy   | Energy of the filtered (1-3 Hz) spectrum, see Hibert et al. (2017)                            |
| 37 | s3_energy   | Energy of the filtered (3-10 Hz) spectrum, see Hibert et al. (2017)                           |
| 38 | s4_energy   | Energy of the filtered (10-20 Hz) spectrum, see Hibert et al. (2017)                          |
| 39 | s5_energy   | Energy of the filtered (20-30 Hz) spectrum, see Hibert et al. (2017)                          |
| 40 | s_gamma1    | Gamma 1, spectral centroid, see Hibert et al. (2017)                                          |
| 41 | s_gamma2    | Gamma 2, spectral gyration radius, see Hibert et al. (2017)                                   |
| 42 | f_modal     | Modal frequency                                                                               |
| 43 | f_mean      | Mean frequency (aka central frequency)                                                        |
| 44 | f_median    | Median frequency                                                                              |
| 45 | f_q05       | Quantile 0.05 of the spectrum                                                                 |
| 46 | f_q25       | Quantile 0.25 of the spectrum                                                                 |
| 47 | f_q75       | Quantile 0.75 of the spectrum                                                                 |
| 48 | f_q95       | Quantile 0.95 of the spectrum                                                                 |
| 49 | f_iqr       | Inter quartile range of the spectrum                                                          |

|    |                  |                                                                                                          |
|----|------------------|----------------------------------------------------------------------------------------------------------|
| 50 | f_centroid       | Spectral centroid                                                                                        |
| 51 | p_kurtosismax    | Kurtosis of the maximum spectral power over time, see Hibert et al. (2017)                               |
| 52 | p_kurtosismedian | Kurtosis of the median spectral power over time, see Hibert et al. (2017)                                |
| 53 | p_maxmean        | Mean of the ratio of max to mean spectral power over time, see Hibert et al. (2017)                      |
| 54 | p_maxmedian      | Mean of the ratio of max to median spectral power over time, see Hibert et al. (2017)                    |
| 55 | p_peaksmean      | Number of peaks in normalised mean spectral power over time, see Hibert et al. (2017)                    |
| 56 | p_peaksmedian    | Number of peaks in normalised median spectral power over time, see Hibert et al. (2017)                  |
| 57 | p_peaksmax       | Number of peaks in normalised max spectral power over time, see Hibert et al. (2017)                     |
| 58 | p_peaksmaxmean   | Ratio of number of peaks in normalised max and mean spectral power over time, see Hibert et al. (2017)   |
| 59 | p_peaksmaxmedian | Ratio of number of peaks in normalised max and median spectral power over time, see Hibert et al. (2017) |
| 60 | p_peaksfcentral  | Number of peaks in spectral power at central frequency over time, see Hibert et al. (2017)               |
| 61 | p_diffmaxmean    | Mean difference between max and mean power, see Hibert et al. (2017)                                     |
| 62 | p_diffquantile21 | Mean difference between power quantiles 2 and 1, see Hibert et al. (2017)                                |
| 63 | p_diffquantile32 | Mean difference between power quantiles 3 and 2, see Hibert et al. (2017)                                |
| 64 | p_diffquantile31 | Mean difference between power quantiles 3 and 1, see Hibert et al. (2017)                                |



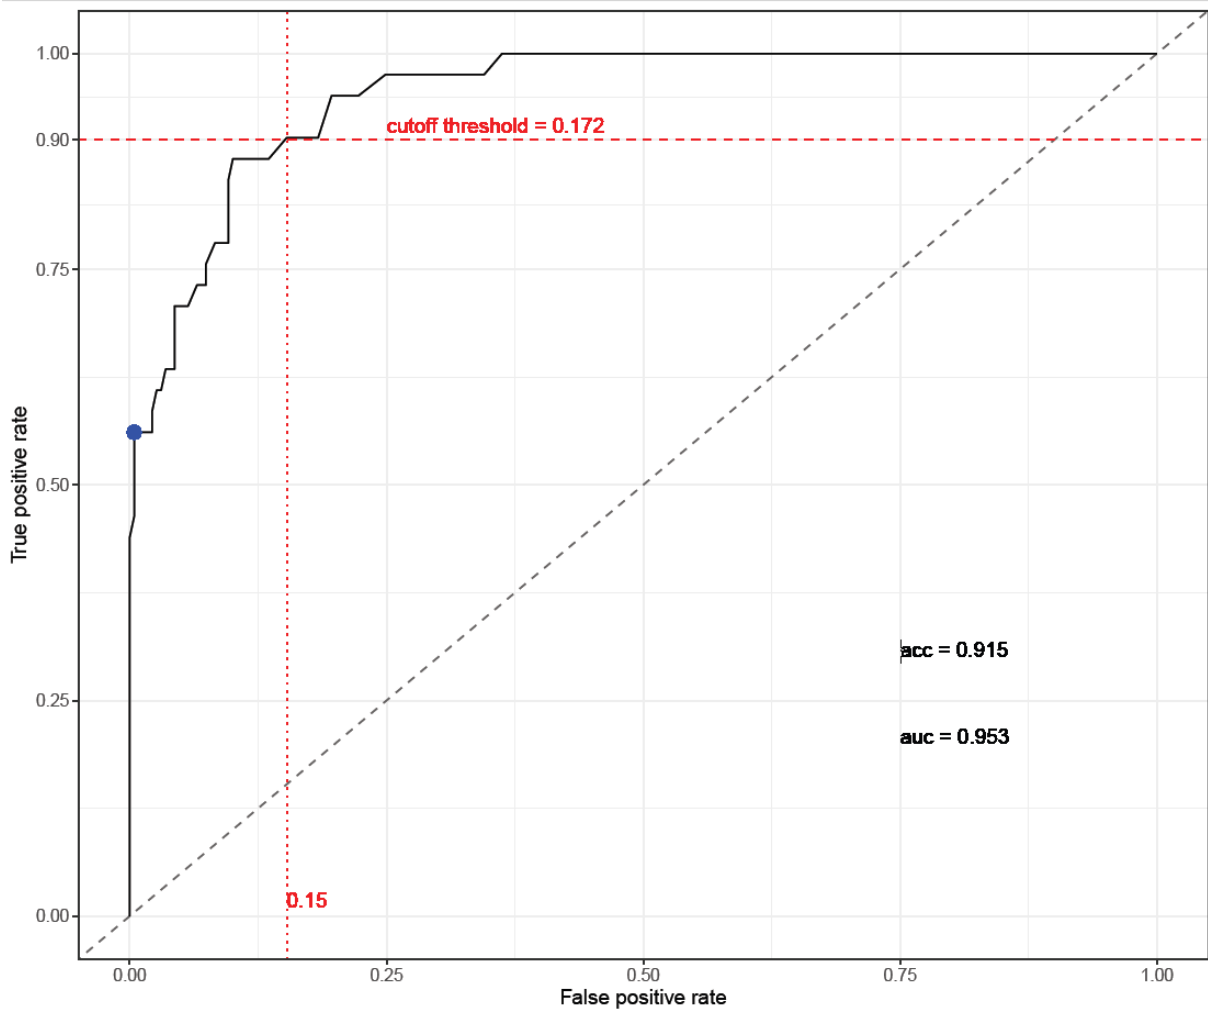

Fig. S 7: ROC (receiver operating characteristic curve) for the first step Random Forest Model showing the cutoff threshold of 0.172 for a true positive rate of 0.9 leading to a false positive rate of 0.15. The blue dot marks the point with the minimum mean misclassification error.

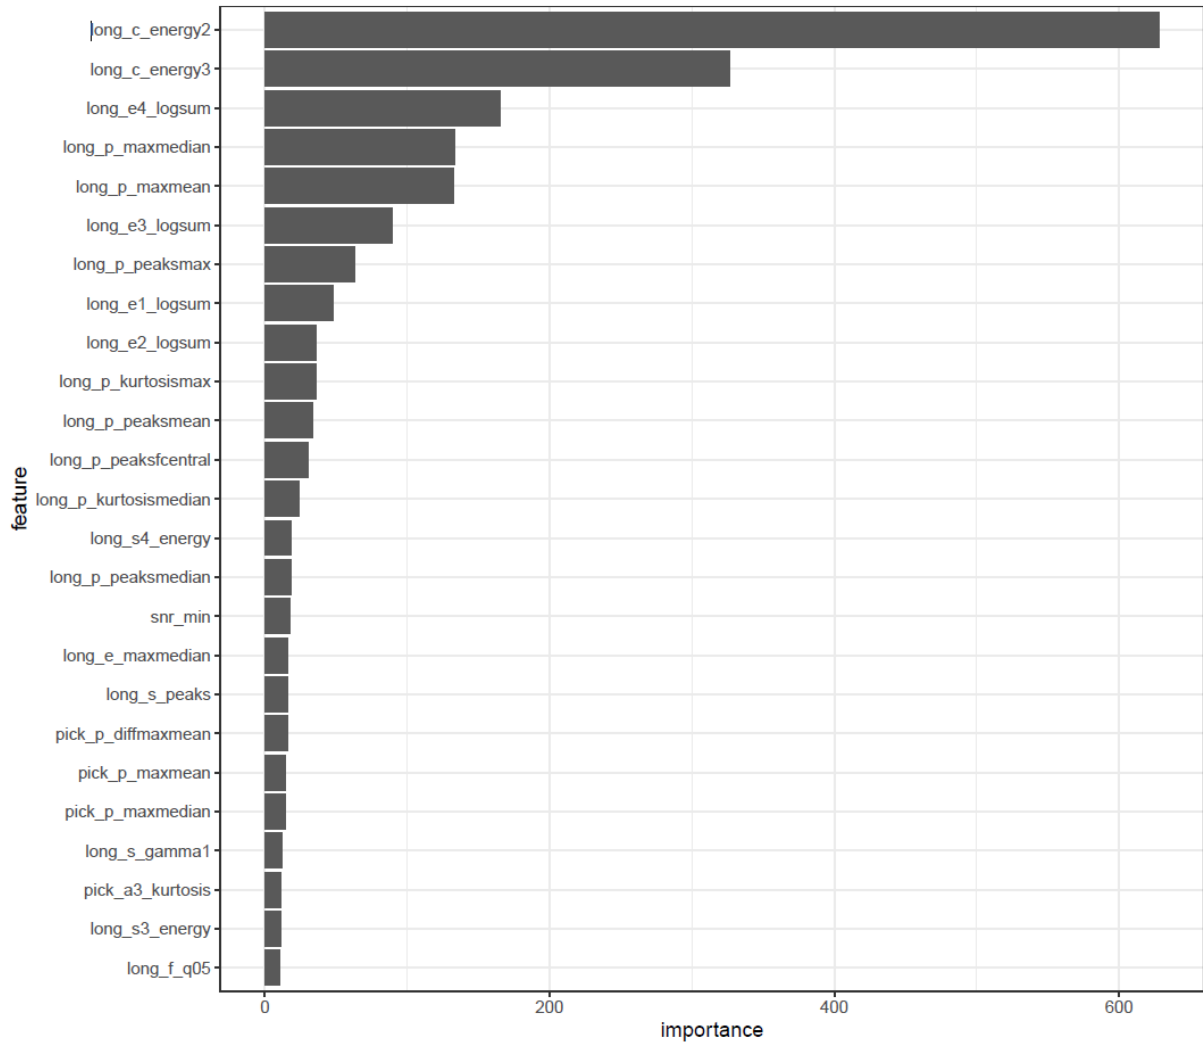

180

Fig. S 8: Variable importance of the 25 most important features in the final Random Forest model.

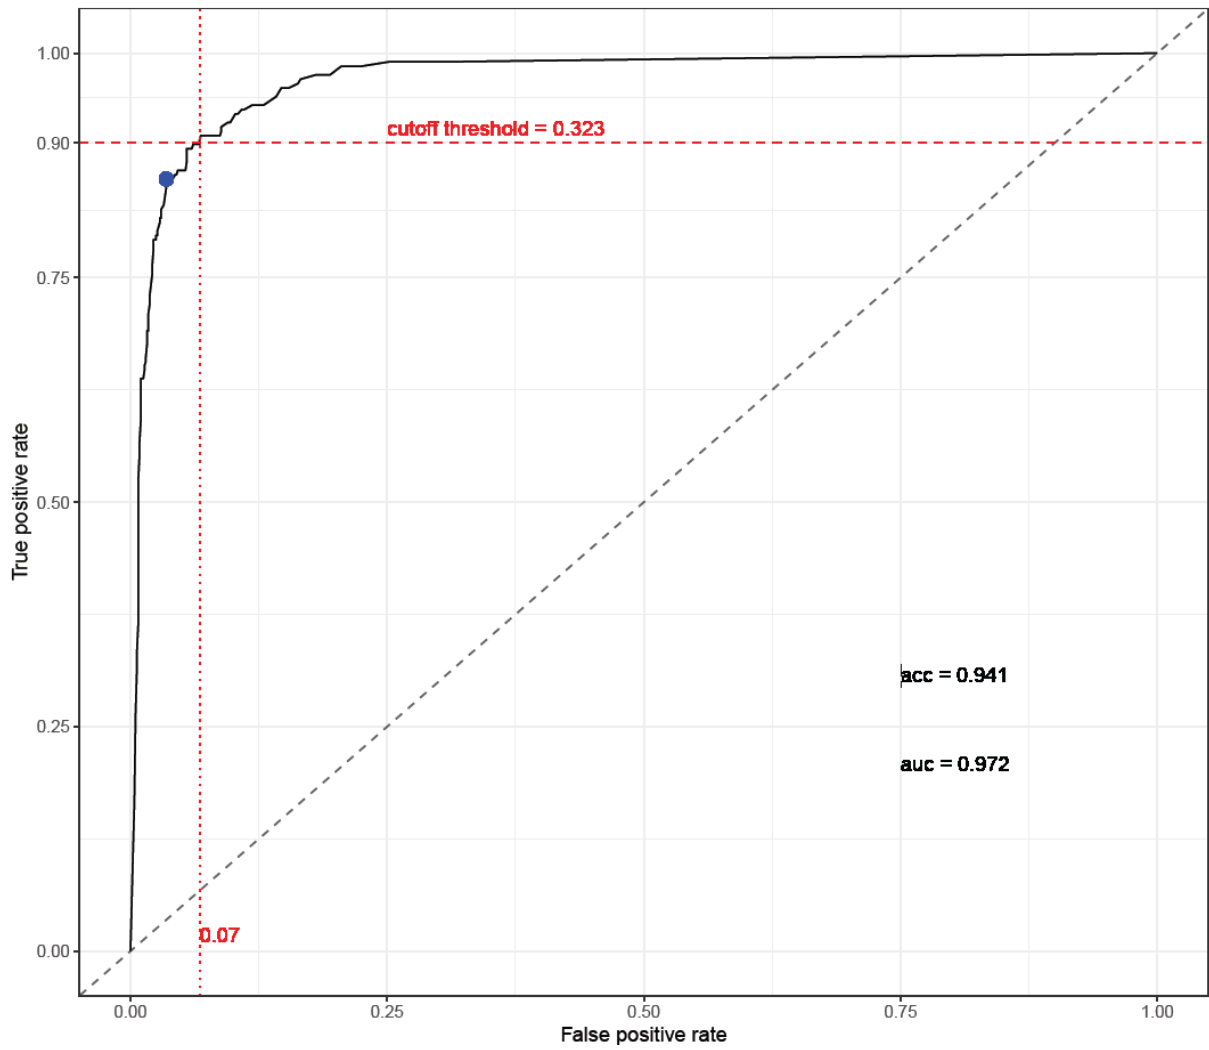

Fig. S 9: ROC (receiver operating characteristic curve) for the refined Random Forest Model showing the cutoff threshold of 0.323 for a true positive rate of 0.9 leading to a false positive rate of 0.07. The blue dot marks the point with the minimum mean misclassification error.

# S5 Focus times

## S5.1 Rain

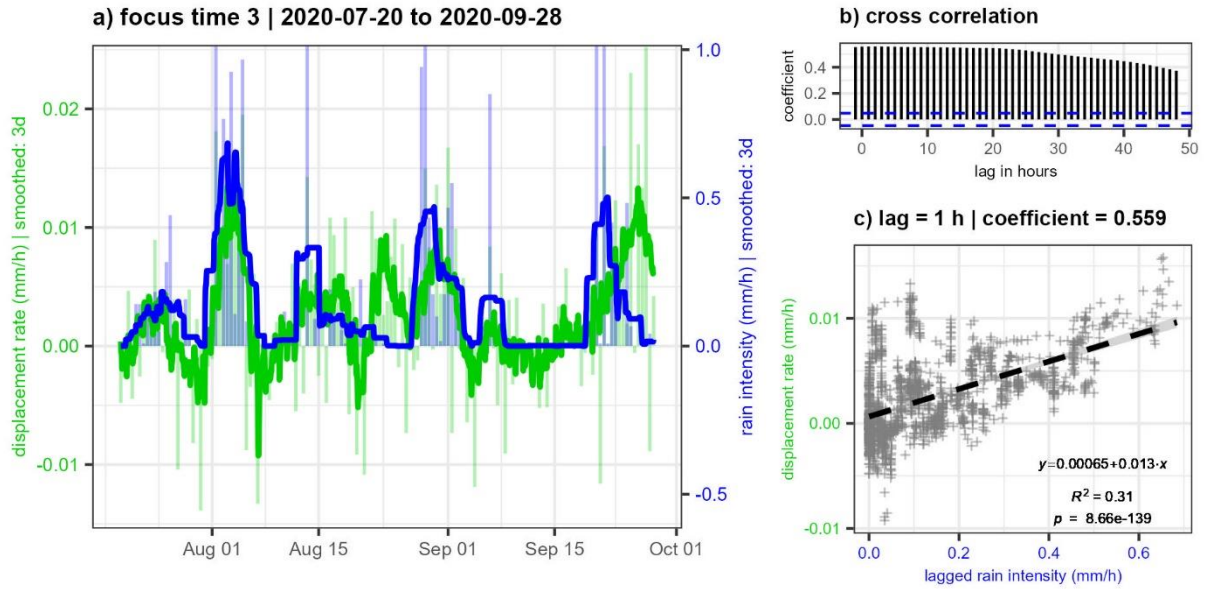

190 Fig. S 10: Detail plot of focus time 3. (a) displacement rate and rain intensity (lines 3 d smoothed, columns 12 h means). (b) cross-correlation coefficient of the two lines. The highest correlation appears with a lag of 1 h and a coefficient of 0.559. (c) scatter plot with linear trendline with 1 h shifted data.

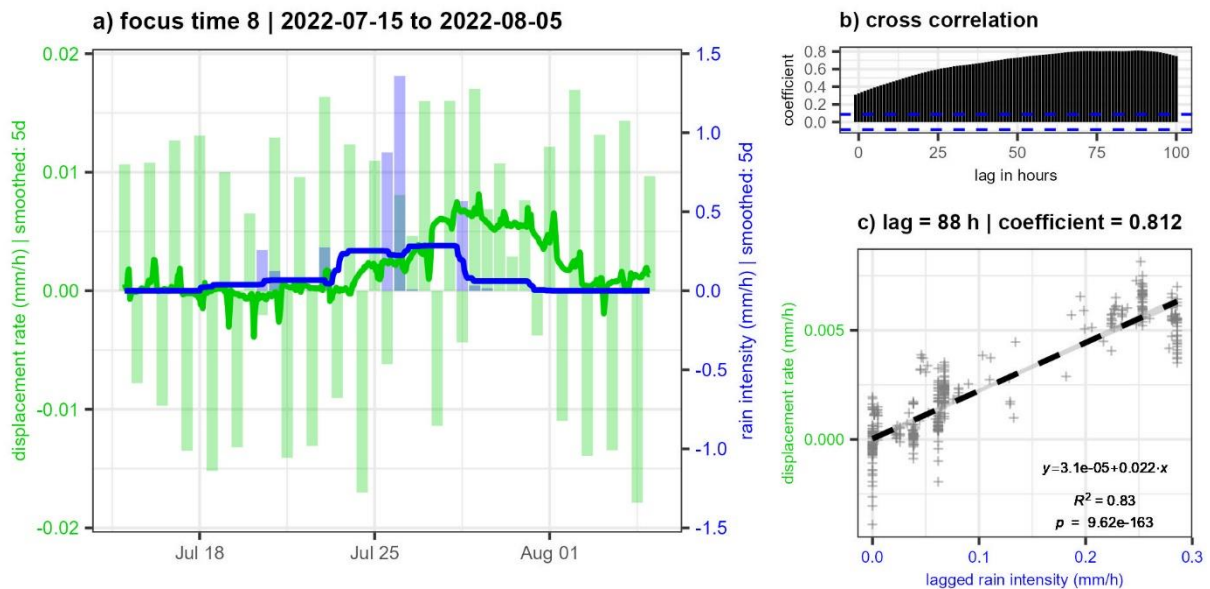

195 Fig. S 11: Detail plot of focus time 8. See how multiple consecutive rain events accumulate in one acceleration. (a) displacement rate and rain intensity (lines 5 d smoothed, columns 12 h means). (b) cross-correlation coefficient of the two lines. The highest correlation appears with a lag of 88 h and a coefficient of 0.812. (c) scatter plot with linear trendline with 88 h shifted data.

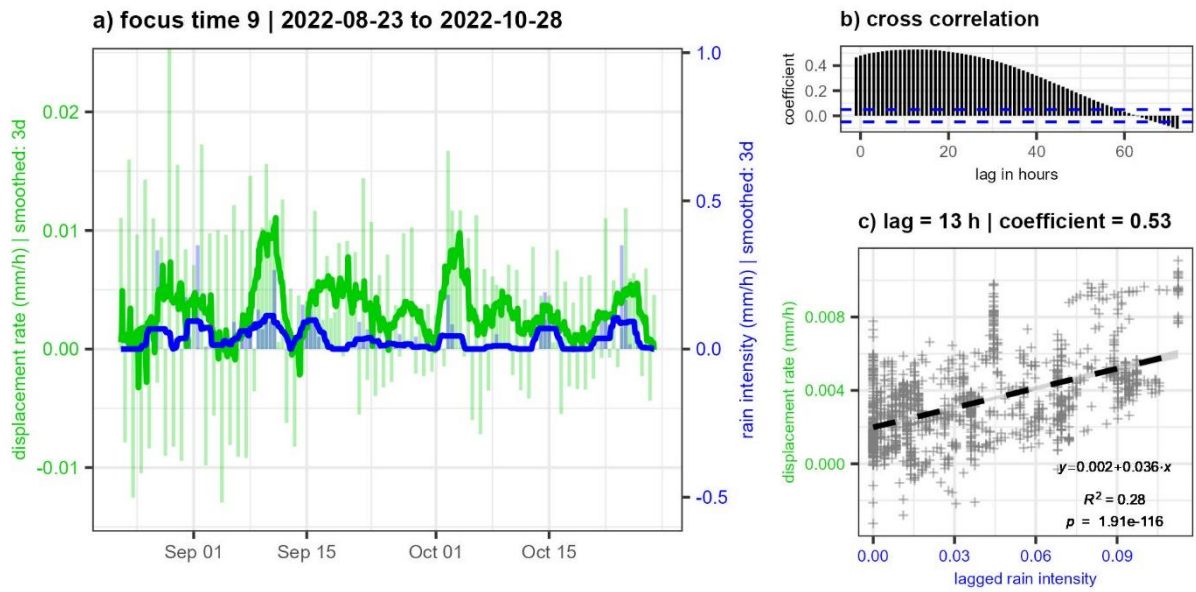

200 Fig. S 12: Detail plot of focus time 9. (a) displacement rate and rain intensity (lines 5 d smoothed, columns 12 h means). (b) cross-correlation coefficient of the two lines. The highest correlation appears with a lag of 13 h and a coefficient of 0.530. (c) scatter plot with linear trendline with 13 h shifted data.

## S5.2 Snow

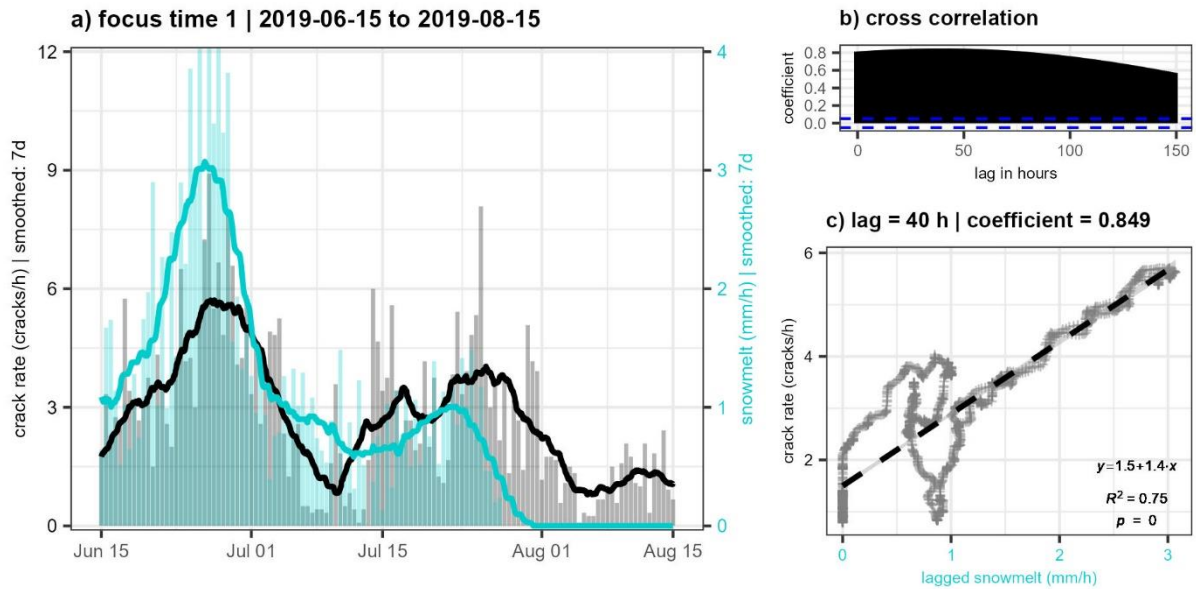

205 Fig. S 13: Detail plot of focus time 1. (a) crack rate and snowmelt (lines 7 d smoothed, columns 12 h means). (b) cross-correlation coefficient of the two lines. The highest correlation appears with a lag of 2 d and a coefficient of 0.849. (c) scatter plot with linear trendline with 40 h shifted data.

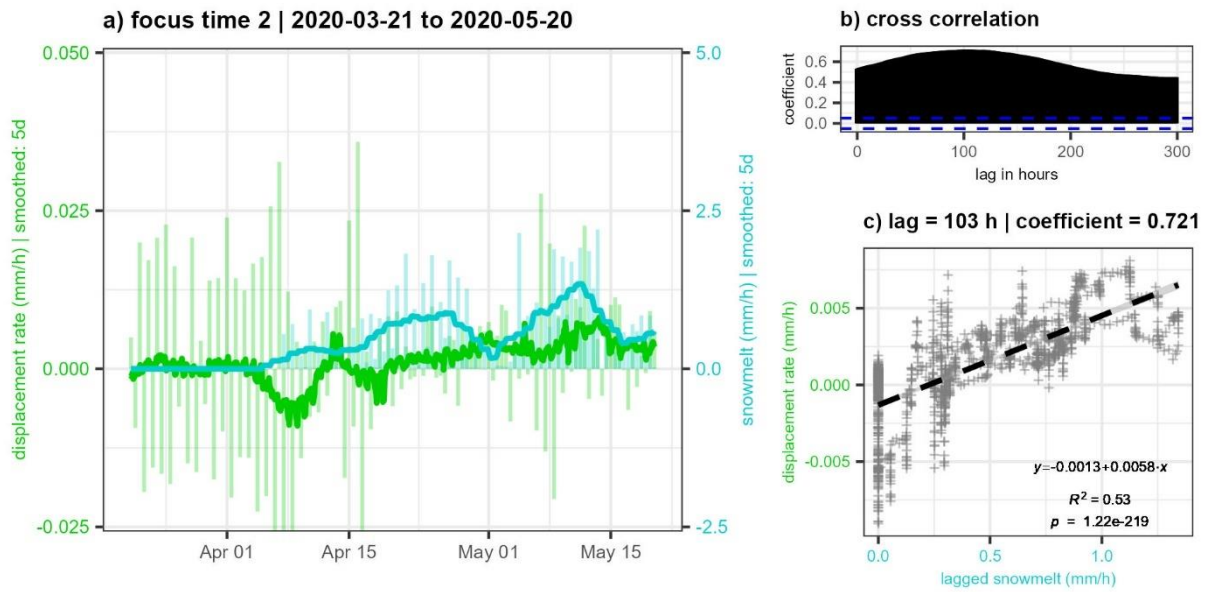

210 Fig. S 14: Detail plot of focus time 2. (a) displacement rate and snowmelt (lines 5 d smoothed, columns 12 h means). (b) cross-correlation coefficient of the two lines. The highest correlation appears with a lag of 4.3 d and a coefficient of 0.721. (c) scatter plot with linear trendline with 103 h shifted data.

### S5.3 Seismic crack events

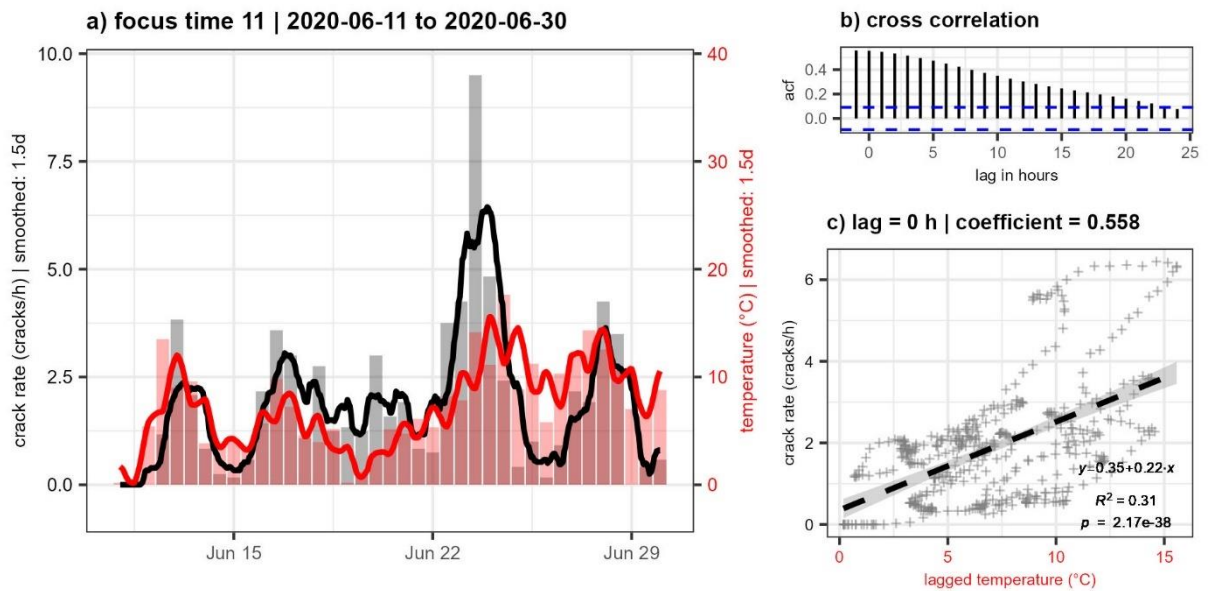

215 Fig. S 15: Detail plot of focus time 11. (a) crack rate and mean temperature (lines 1.5 d smoothed, columns 12 h means). (b) cross-correlation coefficient of the two lines. The highest correlation appears without any lag and a coefficient of 0.558. (c) scatter plot with linear trendline with data not shifted (0 h).

220

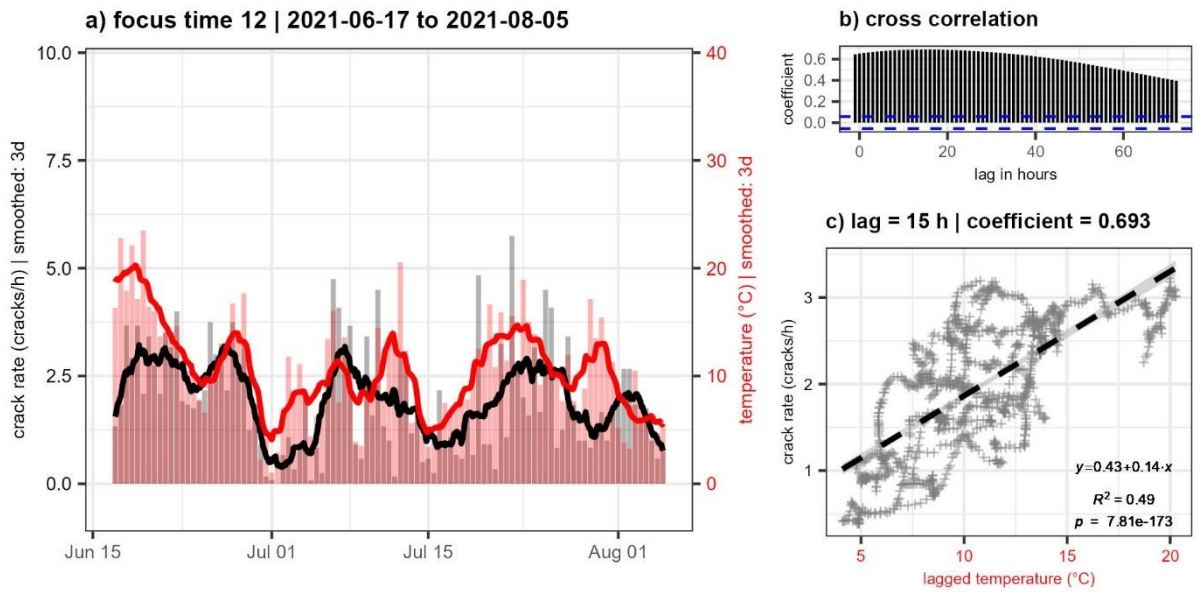

Fig. S 16: Detail plot of focus time 12. (a) crack rate and mean temperature (lines 3 d smoothed, columns 12 h means). (b) cross-correlation coefficient of the two lines. The highest correlation appears with a lag of 15 h and a coefficient of 0.693. (c) scatter plot with linear trendline with 15 h shifted data.

225

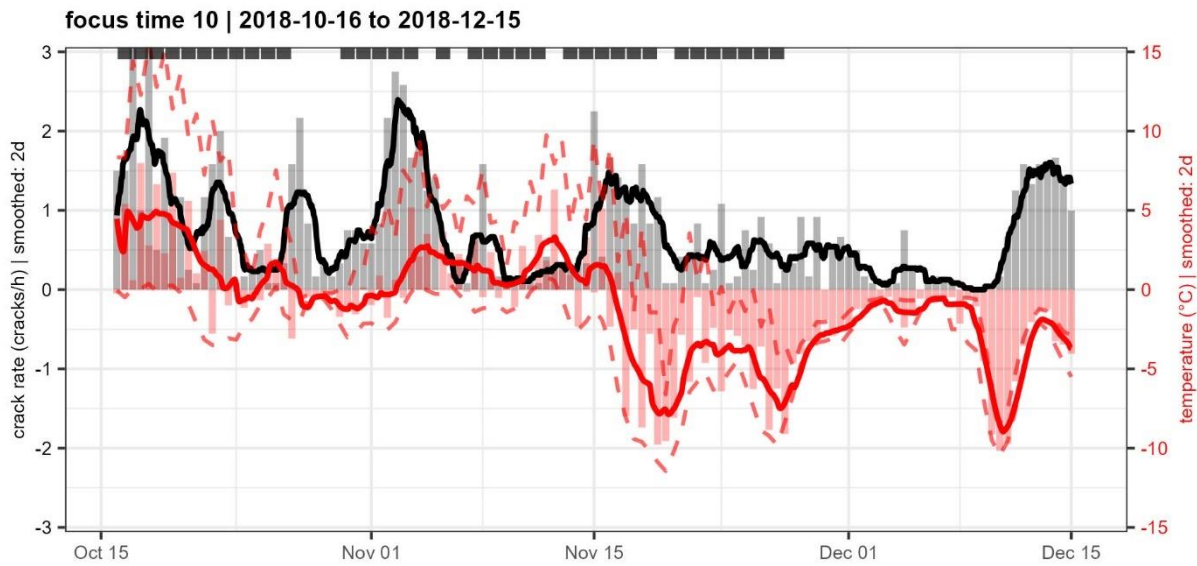

Fig. S 17: Detail plot of focus time 1. Crack rate, mean temperature (solid line), minimum and maximum temperature (dashed lines, all lines 2 d smoothed, columns 12 h means). Peaks in the crack rate coincide with days with freeze-thaw or thaw-freeze conditions (black bars on top). From mid-November onwards, crack rate increases during days with severe temperature drops.

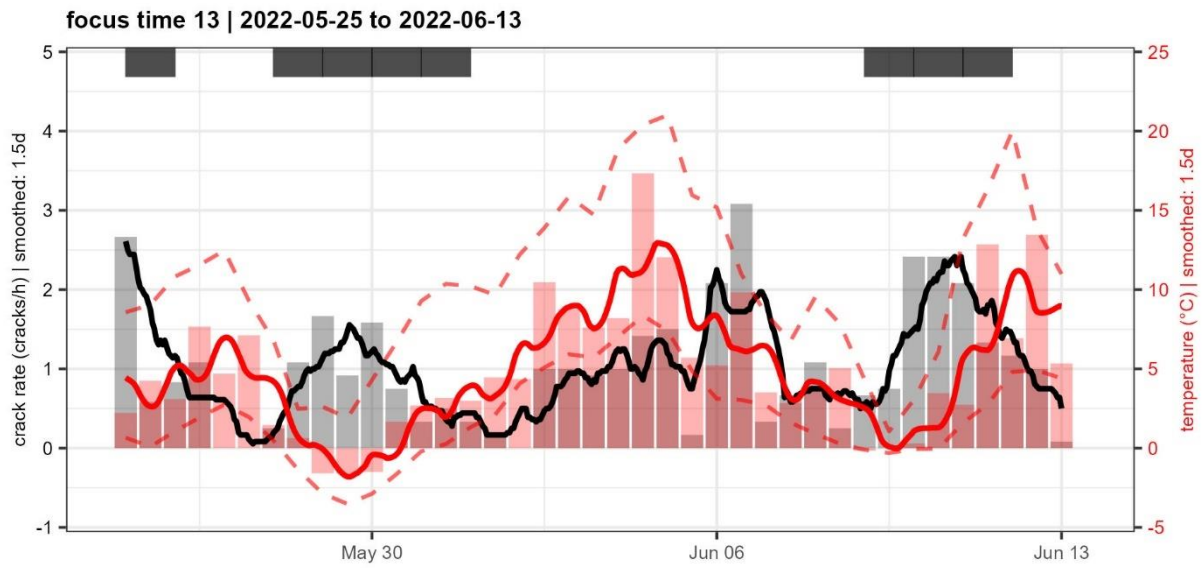

230

Fig. S 18: Detail plot of focus time 13. Crack rate, mean temperature (solid line), minimum and maximum temperature (dashed lines, all lines 1.5 d smoothed, columns 12 h means). Peaks in the crack rate coincide with days with freeze-thaw or thaw-freeze conditions (black bars on top). Beginning of June, crack rate increases with increasing temperatures.



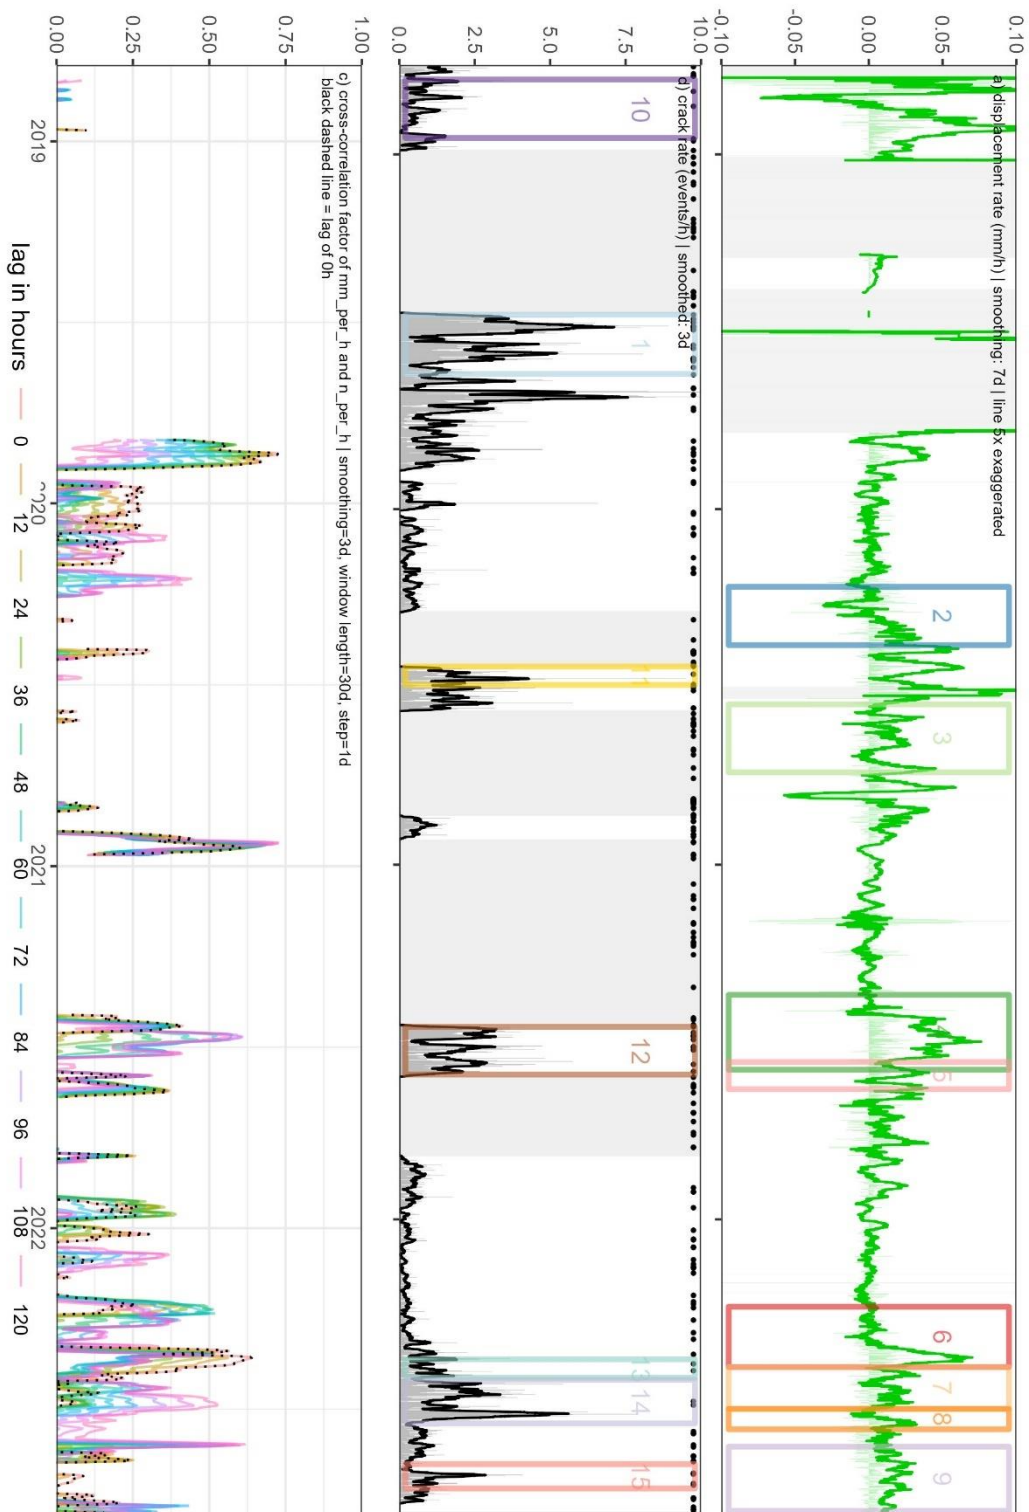

Fig. S 19: Analysed data between Oct 2018 and Nov 2022 with marked and numbered focus times (rectangles). Data are aggregated to 1 h resolution (see the degree of smoothing in the headers). Columns give 12 h means. (a) displacement rate (mm/h), (b) seismic crack rate (events/h), black dots mark the timing of earthquakes from the catalogue. (c) cross-correlation factor for running cross-correlation between the two curves for a 30 d window shifted in 1 d steps. Colours represent different time lags (see legend). The black dashed line marks a lag of 0 h.

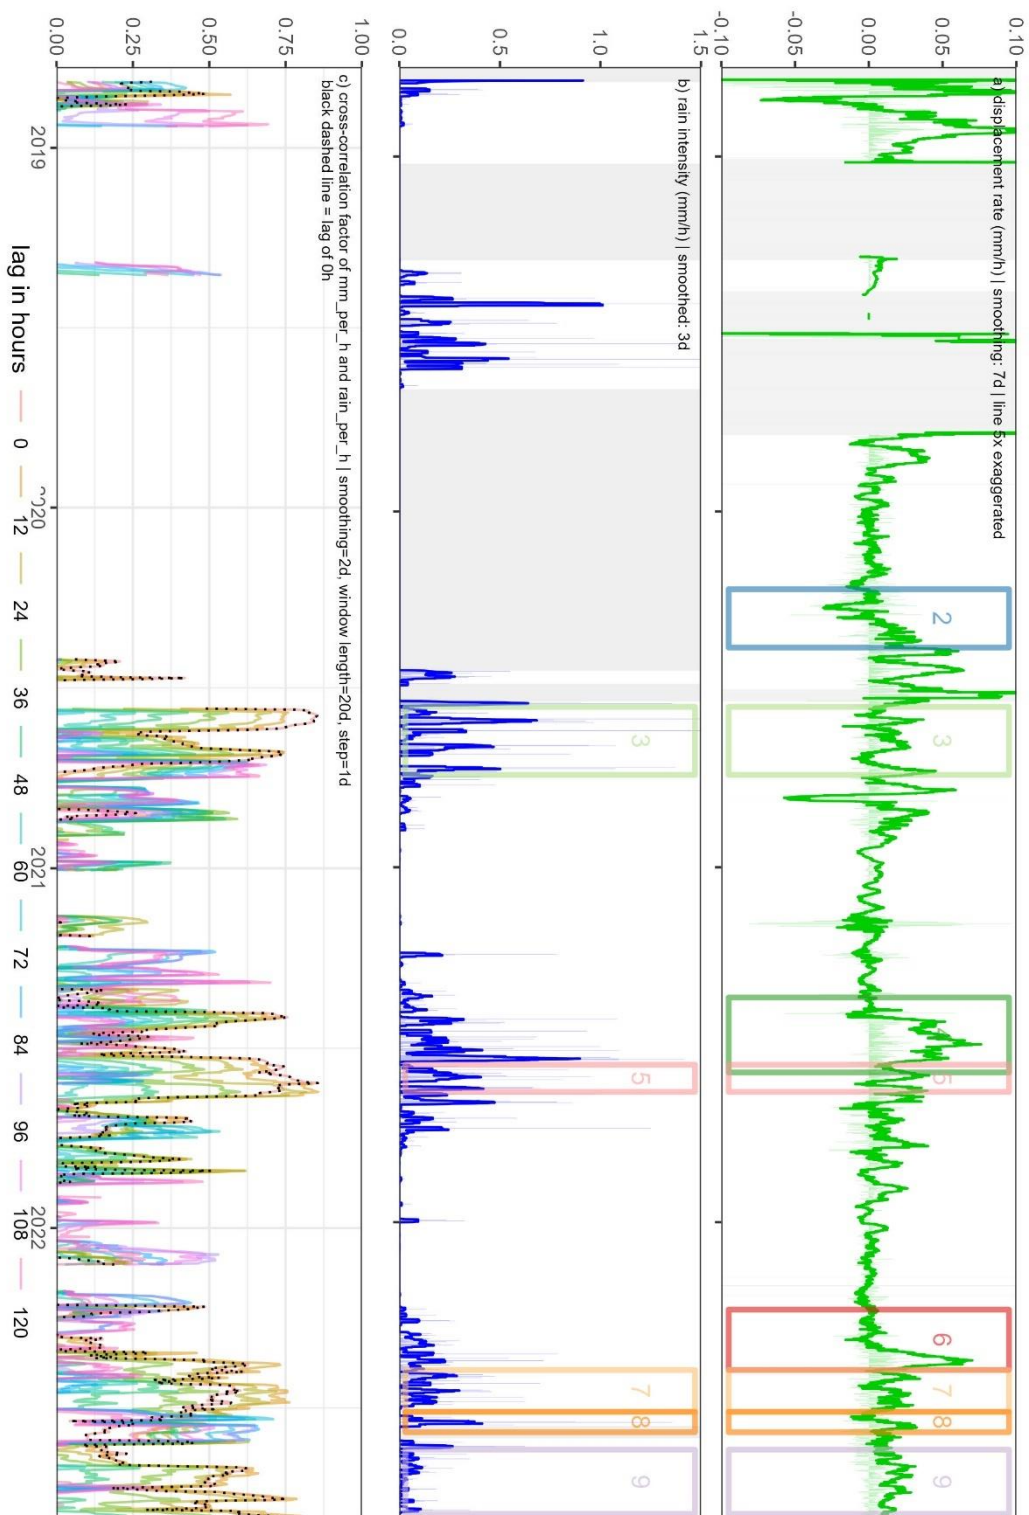

Fig. S 20: Analysed data between Oct 2018 and Nov 2022 with marked and numbered focus times (rectangles). Data are aggregated to 1 h resolution (see the degree of smoothing in the headers). Columns give 12 h means. (a) displacement rate (mm/h), (b) rain intensity (mm/h). (c) cross-correlation factor for running cross-correlation between the two curves for a 20 d window shifted in 1 d steps. Colours represent different time lags (see legend). The black dashed line marks a lag of 0 h.

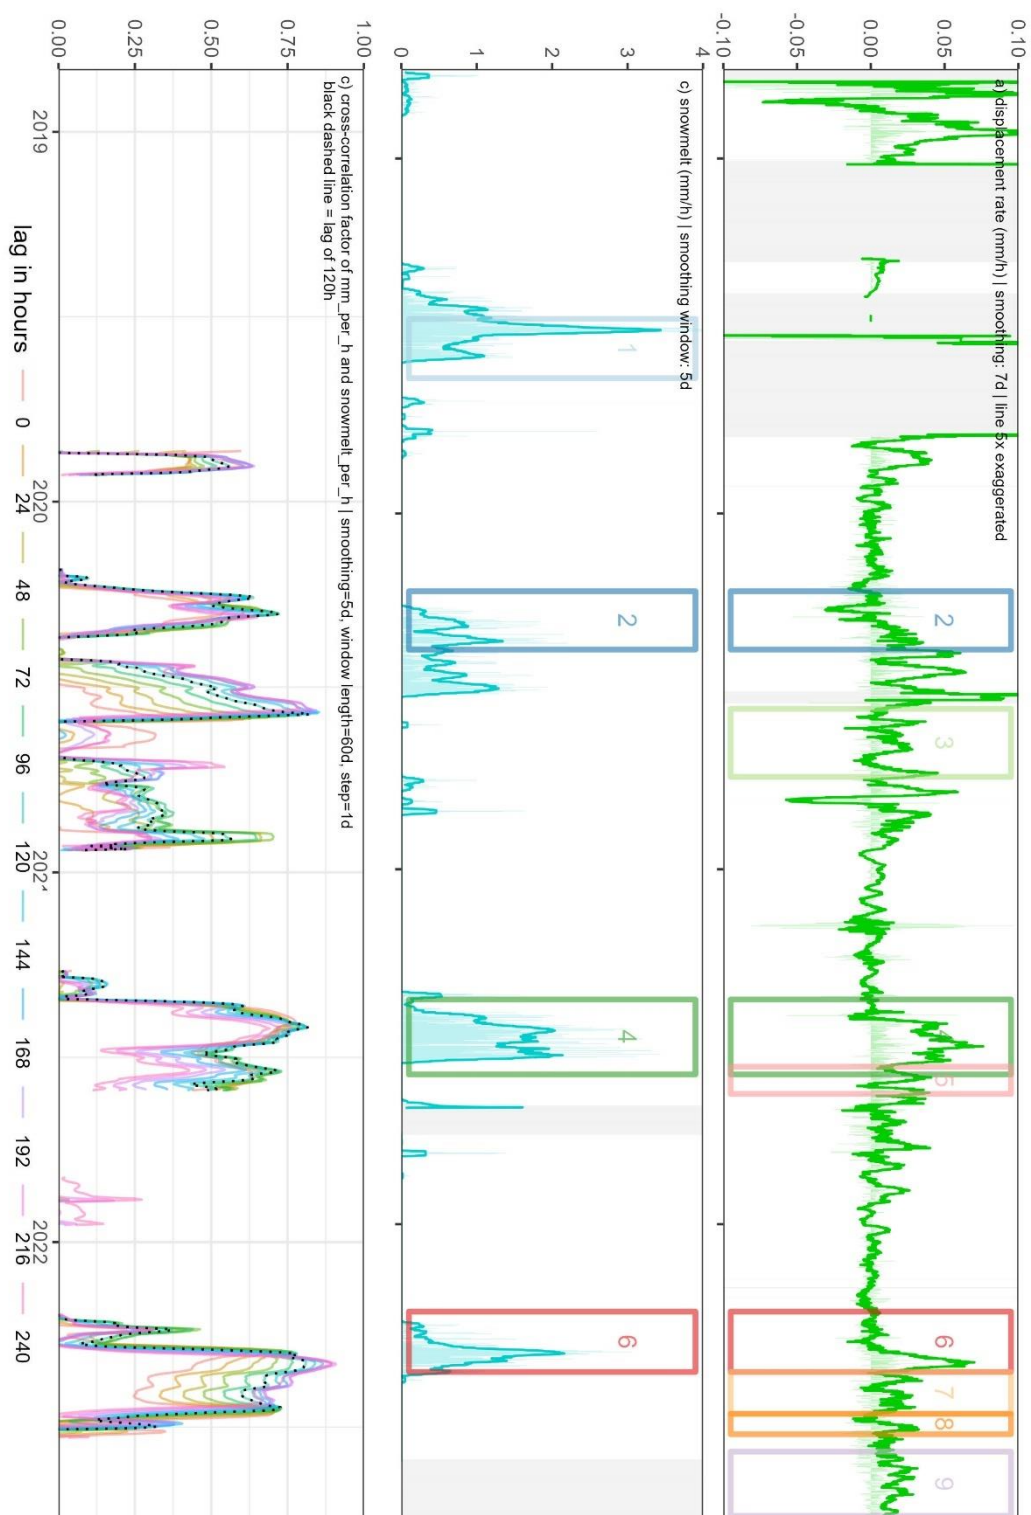

250 Fig. S 21: Analysed data between Oct 2018 and Nov 2022 with marked and numbered focus times (rectangles). Data are aggregated to 1 h resolution (see the degree of smoothing in the headers). Columns give 12 h means. (a) displacement rate (mm/h), (b) snowmelt (mm/h). (c) cross-correlation factor for running cross-correlation between the two curves for a 60 d window shifted in 1 d steps. Colours represent different time lags (see legend). The black dashed line marks a lag of 120 h.

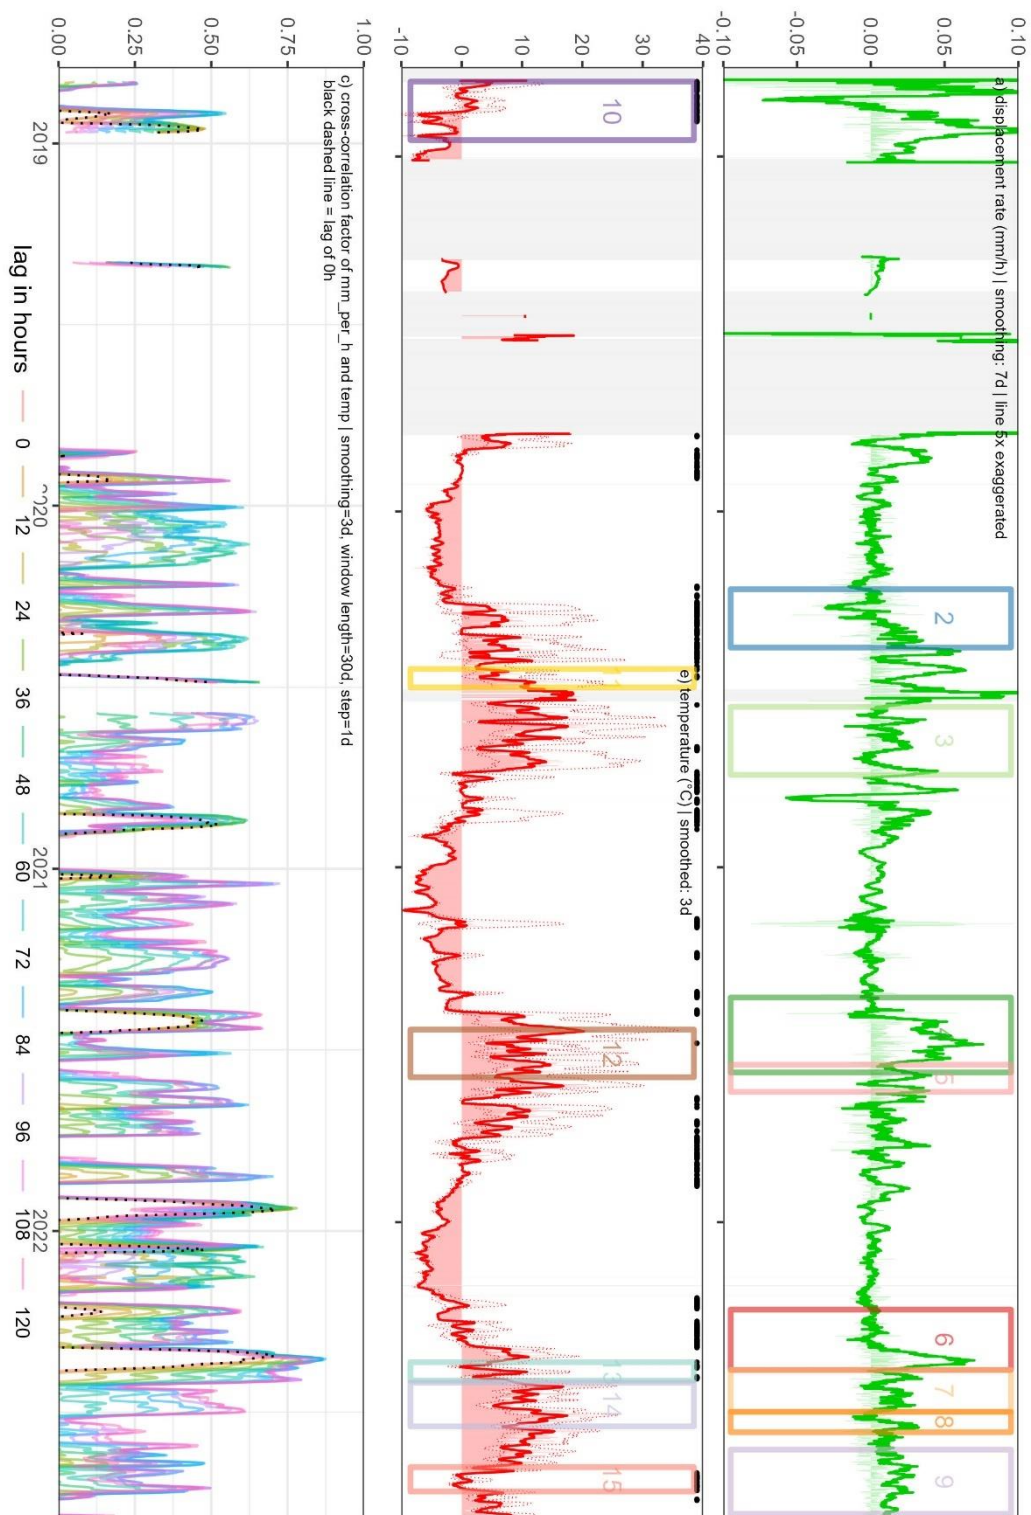

255

Fig. S 22: Analysed data between Oct 2018 and Nov 2022 with marked and numbered focus times (rectangles). Data are aggregated to 1 h resolution (see the degree of smoothing in the headers). Columns give 12 h means. (a) displacement rate (mm/h), (b) temperature ( $^{\circ}\text{C}$ , solid: mean, dashed min/max). Black dots mark days with freeze-thaw/ thaw-freeze conditions. (c) cross-correlation factor for running cross-correlation between the two curves for a 30 d window shifted in 1 d steps. Colours represent different time lags (see legend). The black dashed line marks a lag of 0 h.

260

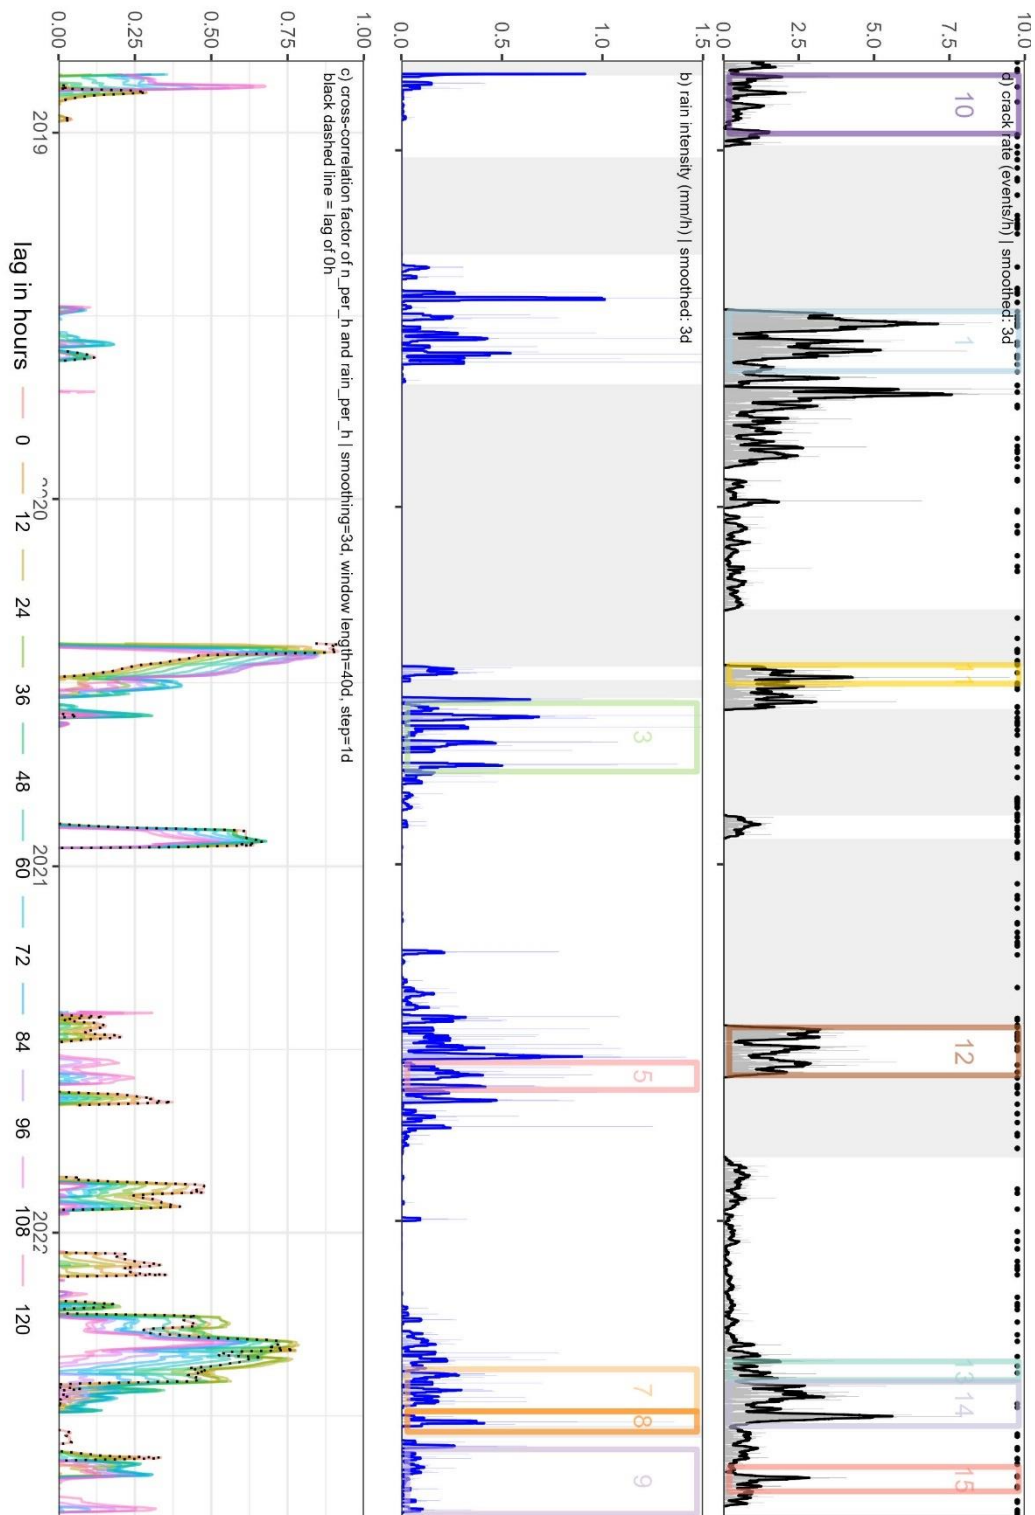

Fig. S 23: Analysed data between Oct 2018 and Nov 2022 with marked and numbered focus times (rectangles). Data are aggregated to 1 h resolution (see the degree of smoothing in the headers). Columns give 12 h means. (a) seismic crack rate (events/h), black dots mark the timing of earthquakes from the catalogue. (b) rain intensity (mm/h). (c) cross-correlation factor for running cross-correlation between the two curves for a 40 d window shifted in 1 d steps. Colours represent different time lags (see legend). The black dashed line marks a lag of 0 h.

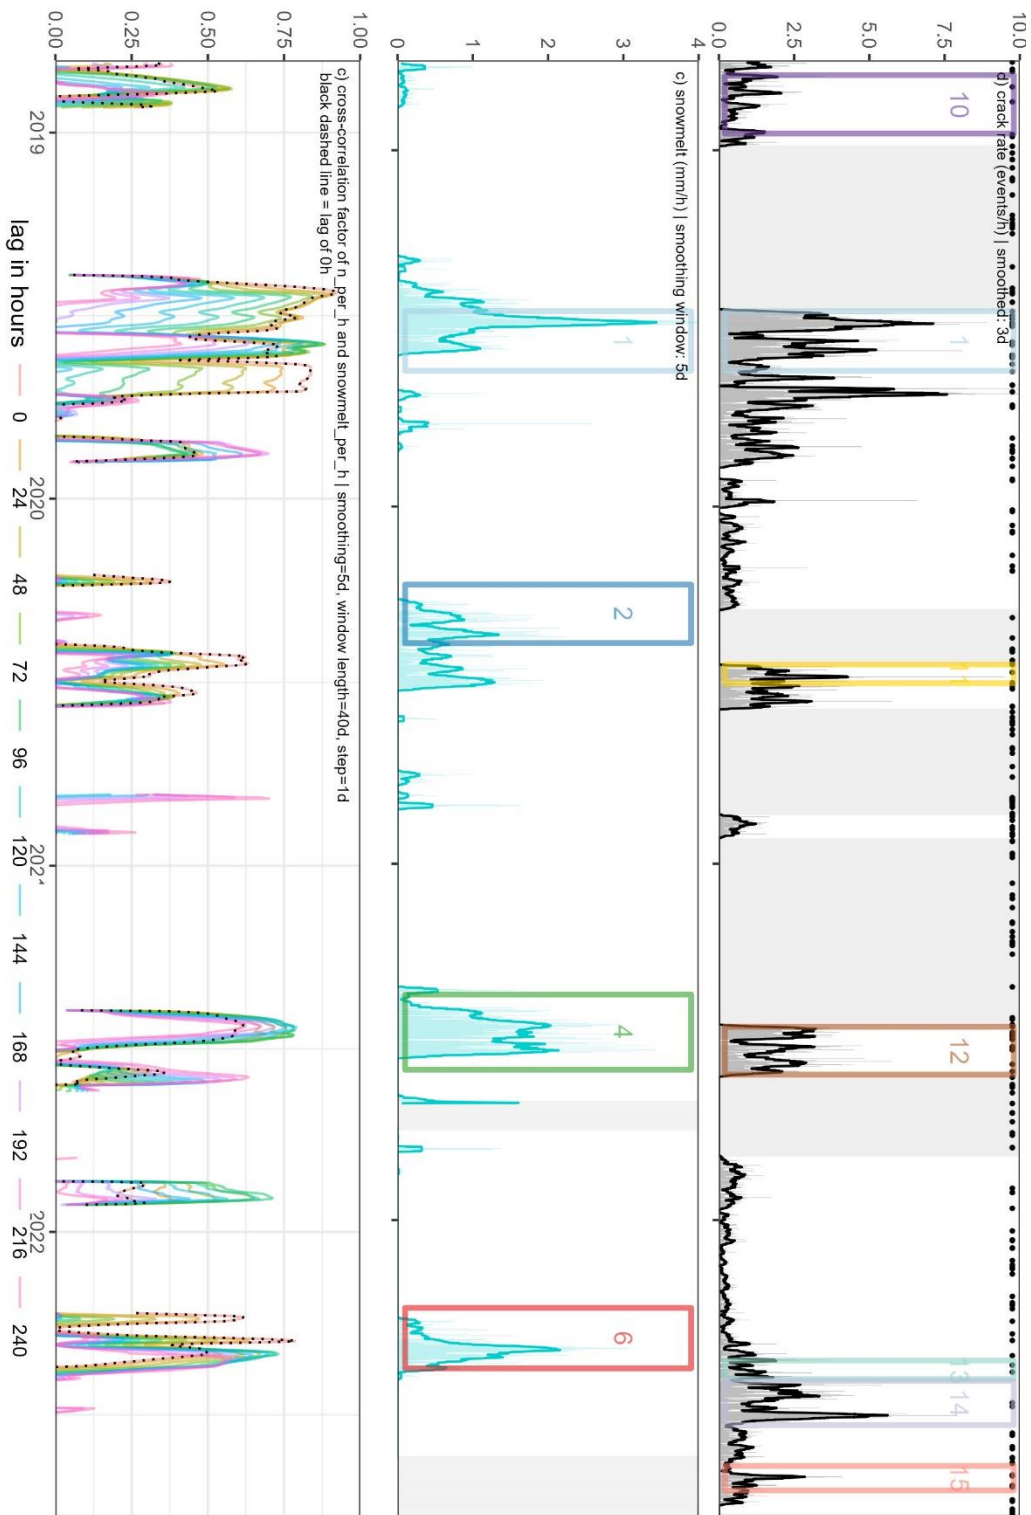

270 Fig. S 24: Analysed data between Oct 2018 and Nov 2022 with marked and numbered focus times (rectangles).  
 Data are aggregated to 1 h resolution (see the degree of smoothing in the headers). Columns give 12 h  
 means. (a) seismic crack rate (events/h), black dots mark the timing of earthquakes from the catalogue.  
 (b) snowmelt (mm/h). (c) cross-correlation factor for running cross-correlation between the two curves  
 for a 40 d window shifted in 1 d steps. Colours represent different time lags (see legend). The black  
 275 dashed line marks a lag of 0 h.

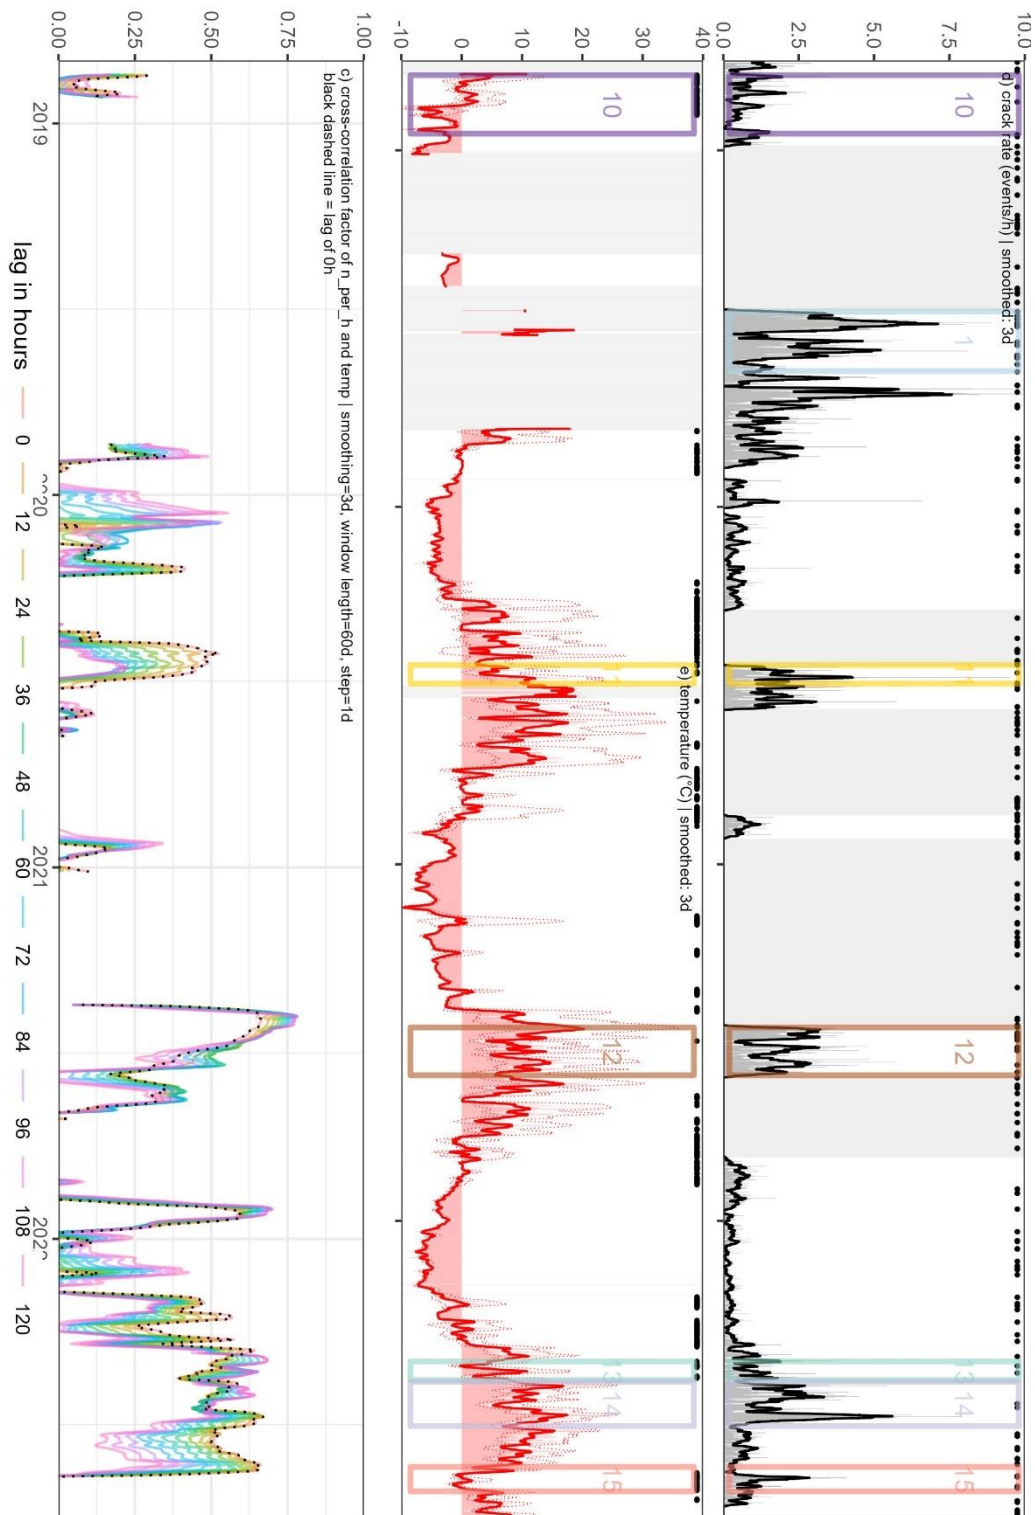

Fig. S 25: Analysed data between Oct 2018 and Nov 2022 with marked and numbered focus times (rectangles). Data are aggregated to 1 h resolution (see the degree of smoothing in the headers). Columns give 12 h means. (a) seismic crack rate (events/h), black dots mark the timing of earthquakes from the catalogue. (b) temperature ( $^{\circ}\text{C}$ , solid: mean, dashed min/max). Black dots mark days with freeze-thaw/thaw-freeze conditions. (c) cross-correlation factor for running cross-correlation between the two curves for a 60 d window shifted in 1 d steps. Colours represent different time lags (see legend). The black dashed line marks a lag of 0 h.

## S7 Earthquake analysis

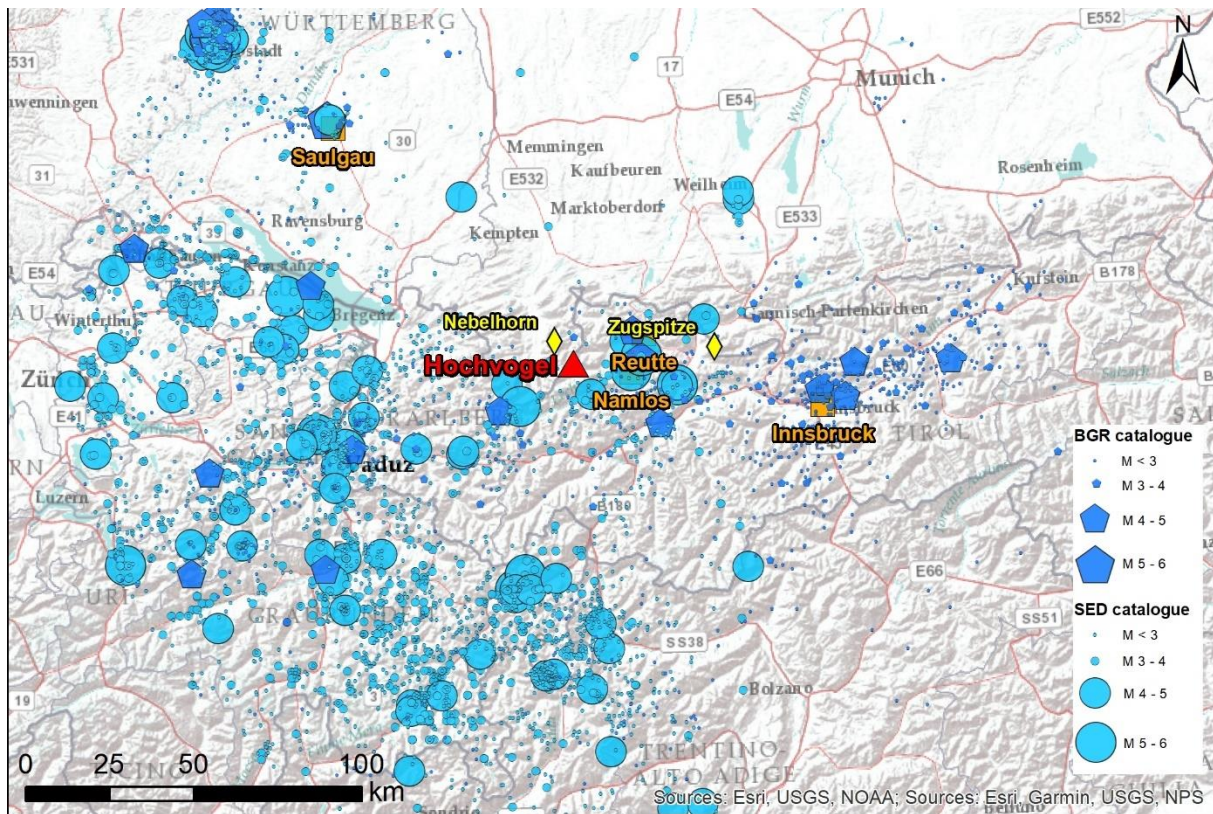

285

Fig. S 26: Map showing all earthquakes of the catalogue with  $M > 2$  and less than 150 km away from the Hochvogel. Note the clustering of events along the valleys next to the Hochvogel region: Inn, Lech, Alfenz and Rhein. Yellow diamonds mark the two snow stations at Nebelhorn (2075 m a.s.l.) and Zugspitze (2420 m a.s.l.). Basemap and labelling source: Esri, USGS, NOAA, Garmin, NPS.

290



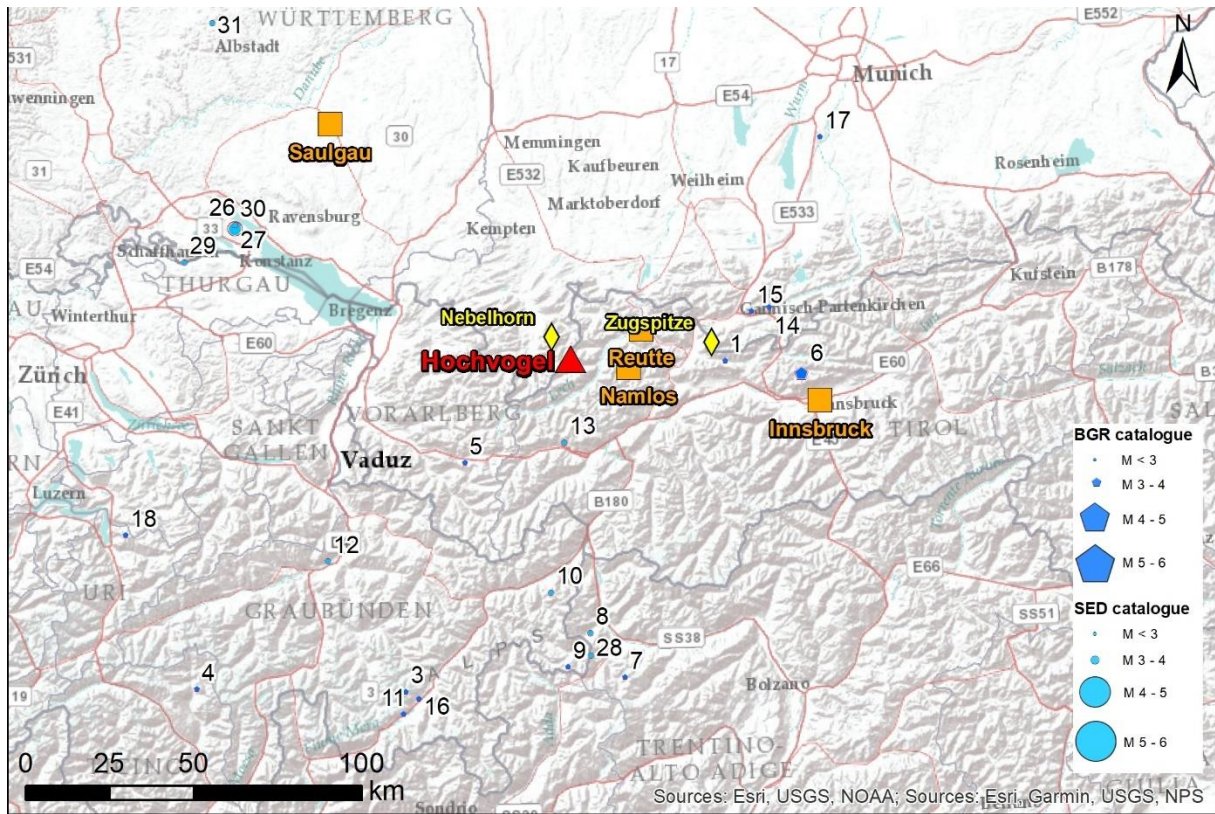

Fig. S 27: Map showing all earthquakes of the catalogue with  $M > 2$  and less than 150 km away from the Hochvogel that happened during station operation of HVGL1 at the summit and at least one more station further down. Events are labelled with a ID-number between 1–31. Yellow diamonds mark the two snow stations at Nebelhorn (2075 m a.s.l.) and Zugspitze (2420 m a.s.l.). Basemap and labelling source: Esri, USGS, NOAA, Garmin, NPS.

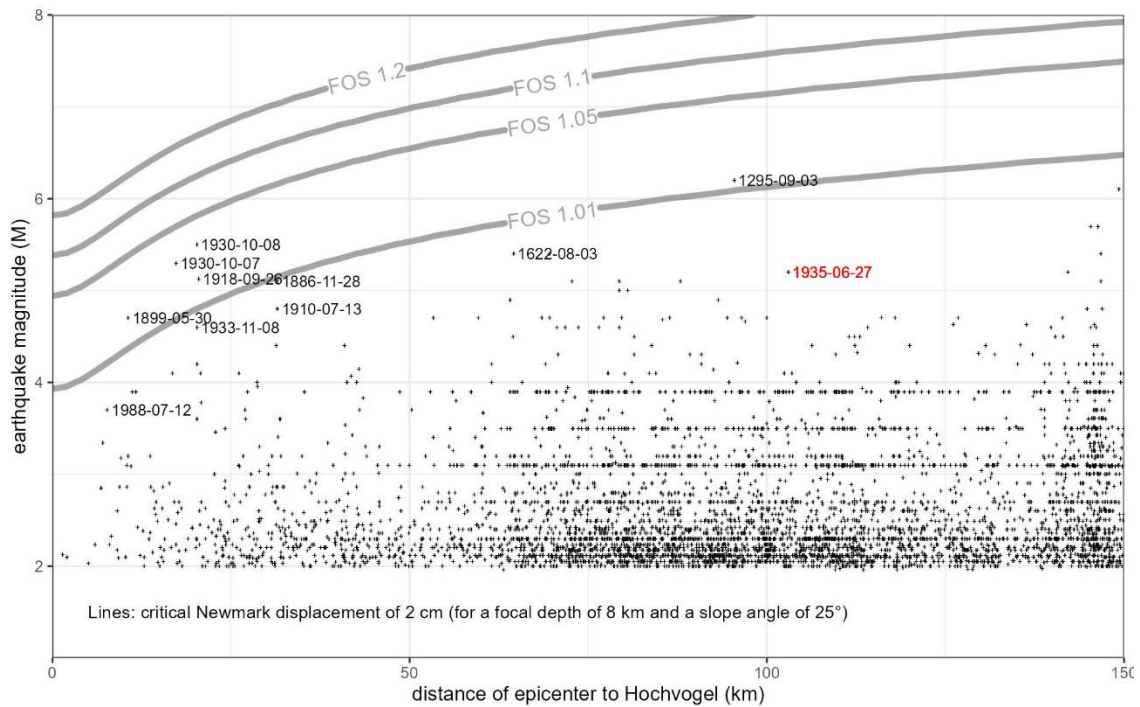

300

Fig. S 28: Lines indicate for different factors of safety, at which magnitude and distance of an earthquake a theoretical Newmark displacement of 2 cm is expected. This calculation is based on the mean focal depth of 8 km and a slope angle of 25°. All earthquakes from the catalogues are plotted with black crosses. The earthquakes with the 10 biggest Newmark displacements are labelled in black with their dates. The Saulgau 1935 event is labelled in red.

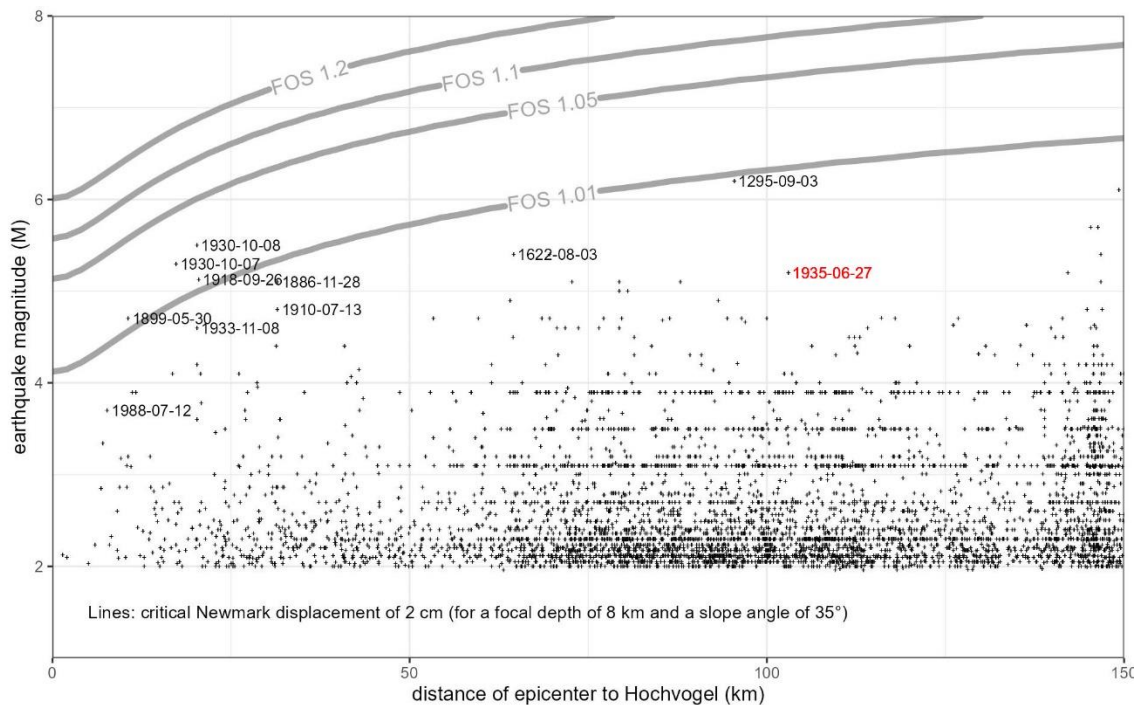

305

Fig. S 29: Lines indicate for different factors of safety, at which magnitude and distance of an earthquake a theoretical Newmark displacement of 2 cm is expected. This calculation is based on the mean focal depth of 8 km and a slope angle of 35°. All earthquakes from the catalogues are plotted with black crosses. The earthquakes with the 10 biggest Newmark displacements are labelled in black with their dates. The Saulgau 1935 event is labelled in red.

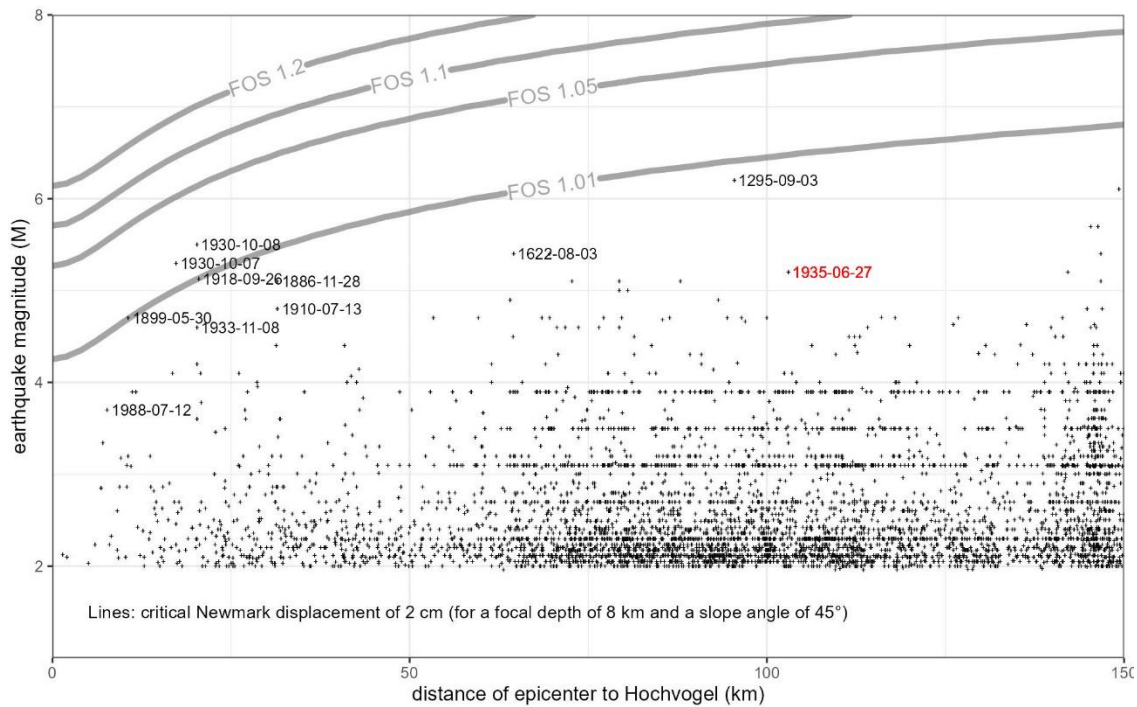

310

Fig. S 30: Lines indicate for different factors of safety, at which magnitude and distance of an earthquake a theoretical Newmark displacement of 2 cm is expected. This calculation is based on the mean focal depth of 8 km and a slope angle of 45°. All earthquakes from the catalogues are plotted with black crosses. The earthquakes with the 10 biggest Newmark displacements are labelled in black with their dates. The Saulgau 1935 event is labelled in red.

315

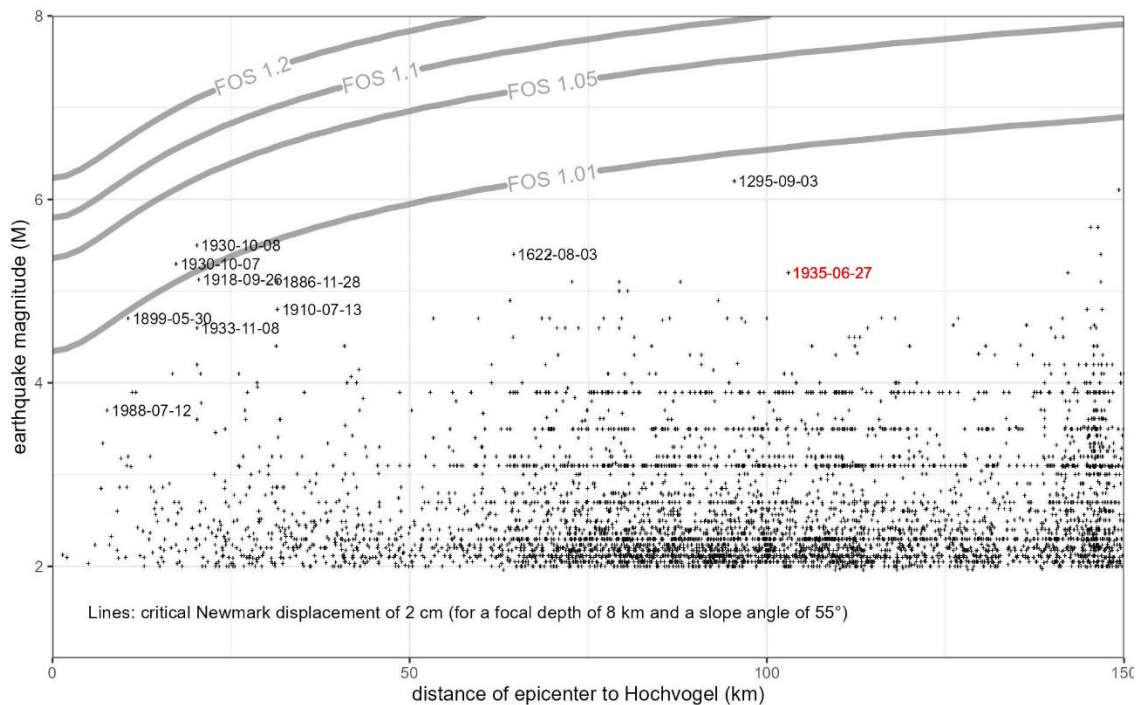

320

Fig. S 31: Lines indicate for different factors of safety, at which magnitude and distance of an earthquake a theoretical Newmark displacement of 2 cm is expected. This calculation is based on the mean focal depth of 8 km and a slope angle of 55°. All earthquakes from the catalogues are plotted with black crosses. The earthquakes with the 10 biggest Newmark displacements are labelled in black with their dates. The Saulgau 1935 event is labelled in red.

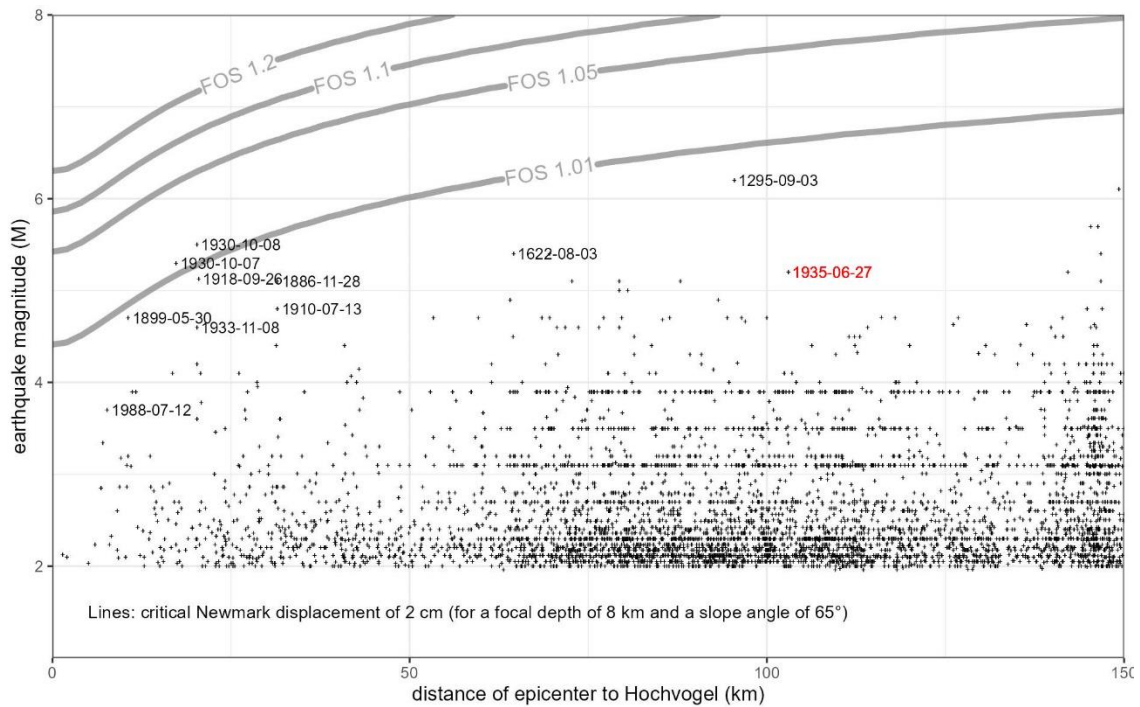

Fig. S 32: Lines indicate for different factors of safety, at which magnitude and distance of an earthquake a theoretical Newmark displacement of 2 cm is expected. This calculation is based on the mean focal depth of 8 km and a slope angle of 65°. All earthquakes from the catalogues are plotted with black crosses. The earthquakes with the 10 biggest Newmark displacements are labelled in black with their dates. The Saulgau 1935 event is labelled in red.

325

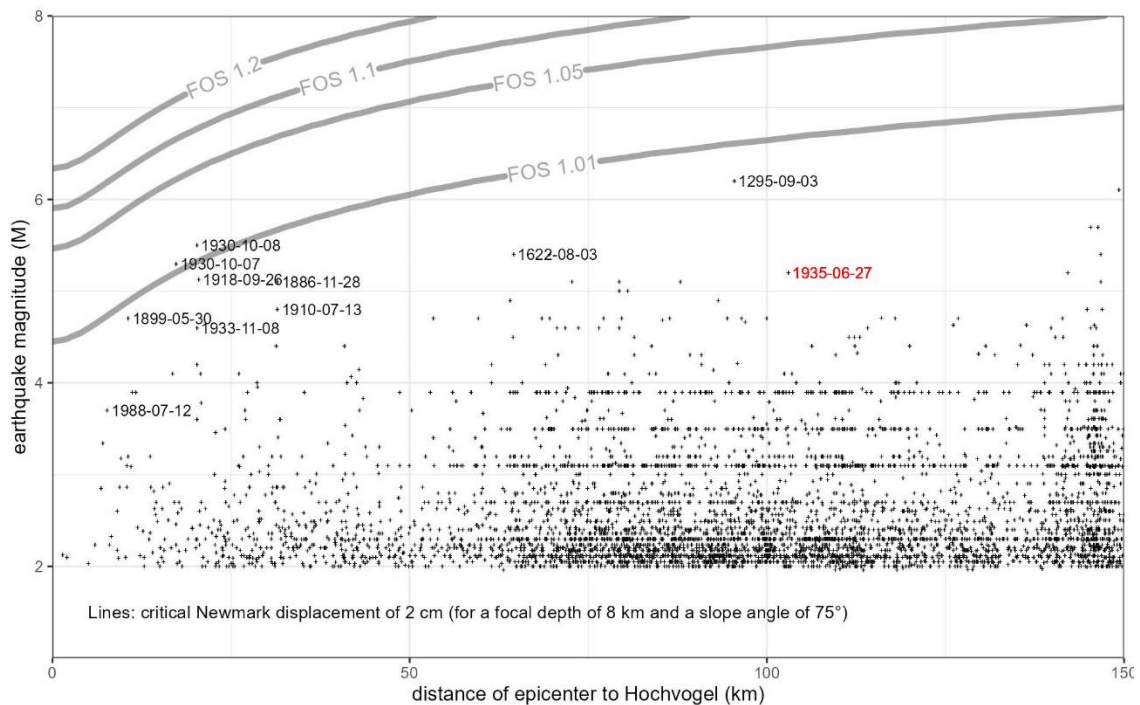

Fig. S 33: Lines indicate for different factors of safety, at which magnitude and distance of an earthquake a theoretical Newmark displacement of 2 cm is expected. This calculation is based on the mean focal depth of 8 km and a slope angle of 75°. All earthquakes from the catalogues are plotted with black crosses. The earthquakes with the 10 biggest Newmark displacements are labelled in black with their dates. The Saulgau 1935 event is labelled in red.

330

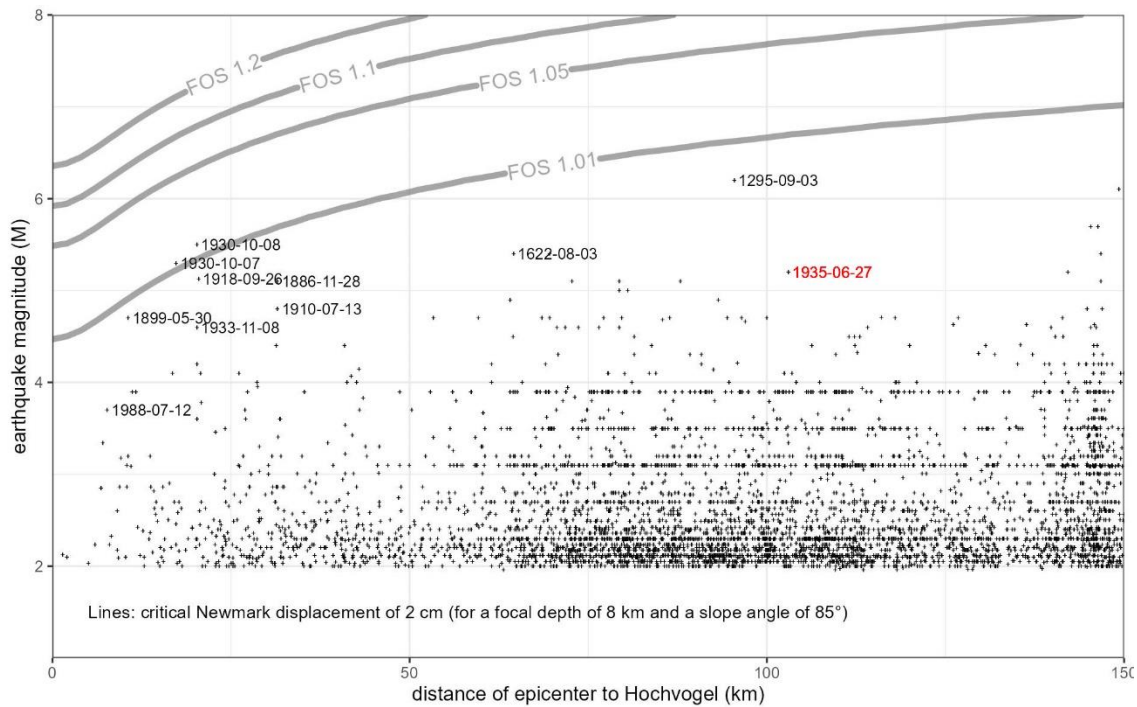

335 Fig. S 34: Lines indicate for different factors of safety, at which magnitude and distance of an earthquake a theoretical Newmark displacement of 2 cm is expected. This calculation is based on the mean focal depth of 8 km and a slope angle of 85°. All earthquakes from the catalogues are plotted with black crosses. The earthquakes with the 10 biggest Newmark displacements are labelled in black with their dates. The Saul-  
gau 1935 event is labelled in red.

340

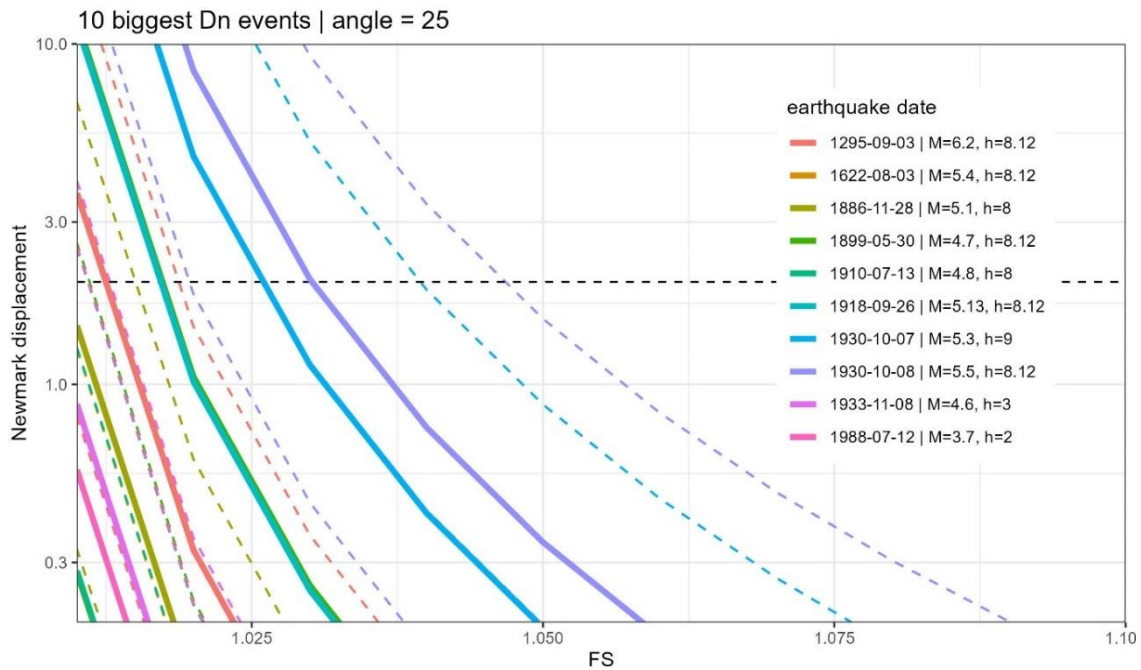

Fig. S 35: Theoretical Newmark displacement against Factor of Safety (FOS) of the 10 events with the biggest Newmark displacement for a slope angle of 25°. Dashed lines mark uncertainty according to the formula. Displacements are only noteworthy for very low FOS.

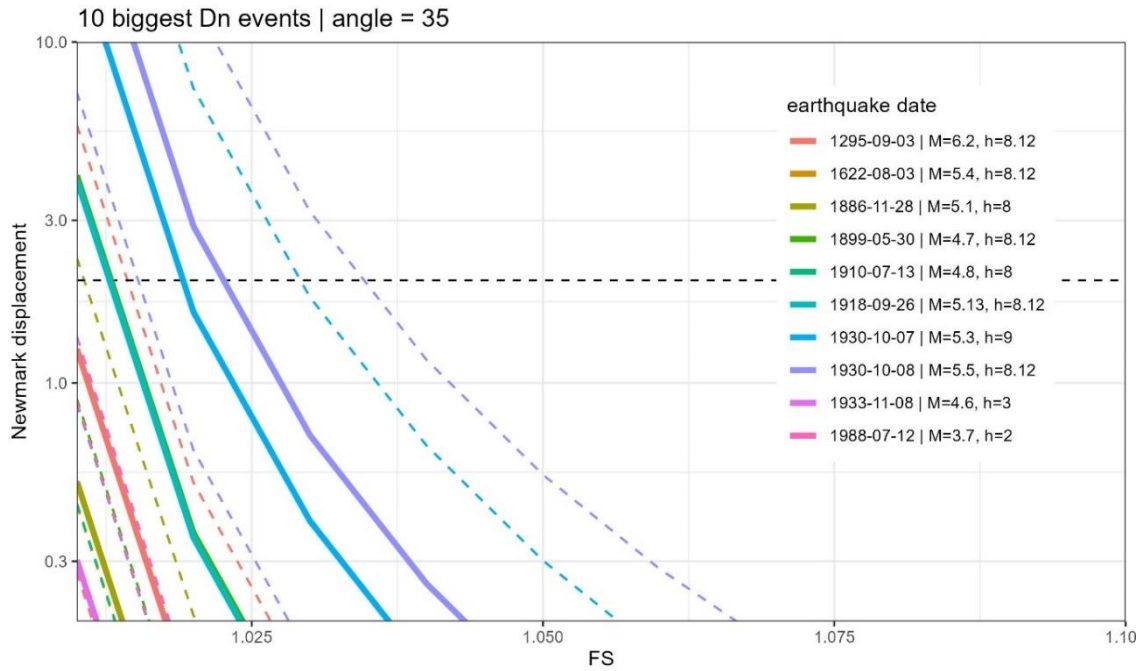

345

Fig. S 36: Theoretical Newmark displacement against Factor of Safety (FOS) of the 10 events with the biggest Newmark displacement for a slope angle of 35°. Dashed lines mark uncertainty according to the formula. Displacements are only noteworthy for very low FOS.

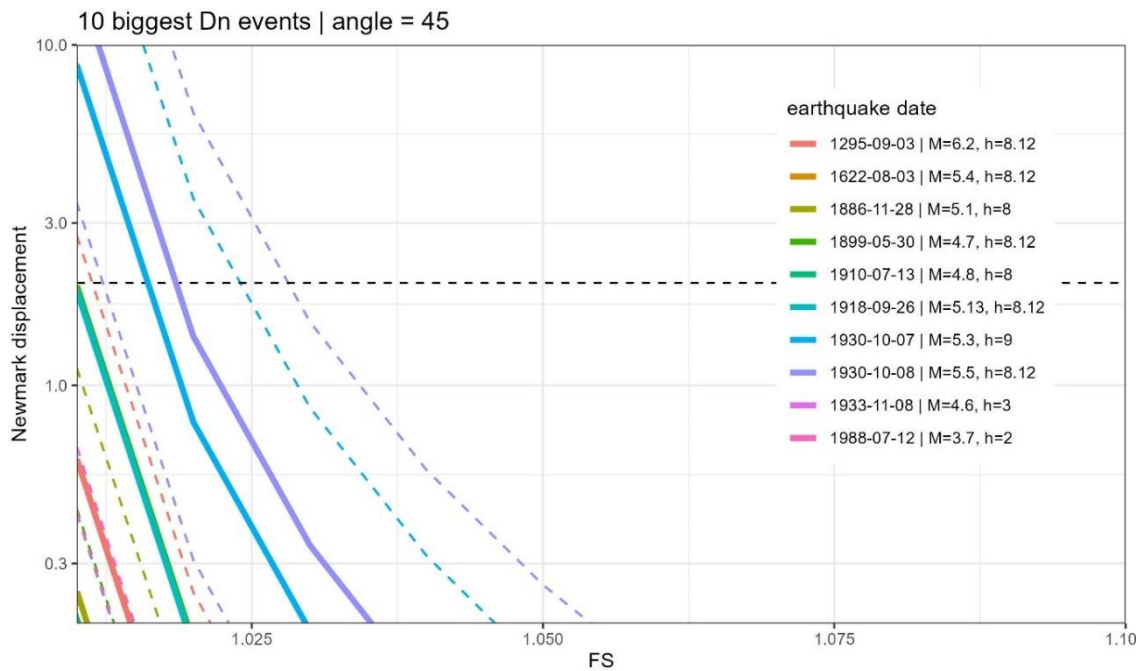

350

Fig. S 37: Theoretical Newmark displacement against Factor of Safety (FOS) of the 10 events with the biggest Newmark displacement for a slope angle of 45°. Dashed lines mark uncertainty according to the formula. Displacements are only noteworthy for very low FOS.

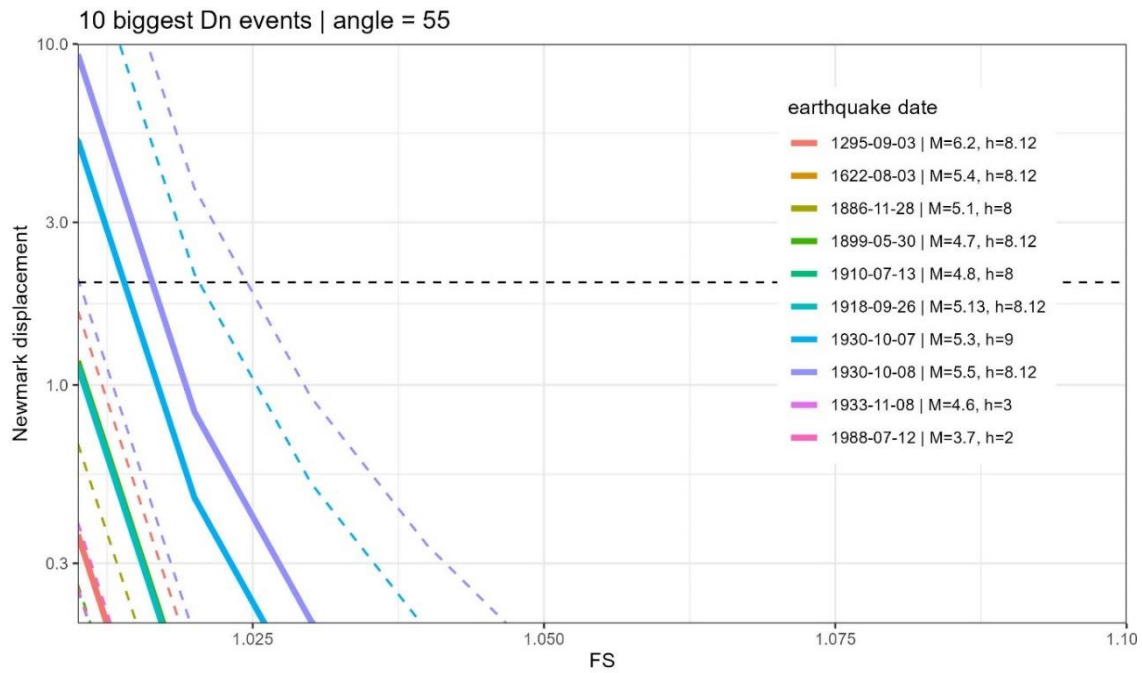

355 Fig. S 38: Theoretical Newmark displacement against Factor of Safety (FOS) of the 10 events with the biggest Newmark displacement for a slope angle of 55°. Dashed lines mark uncertainty according to the formula. Displacements are only noteworthy for very low FOS.

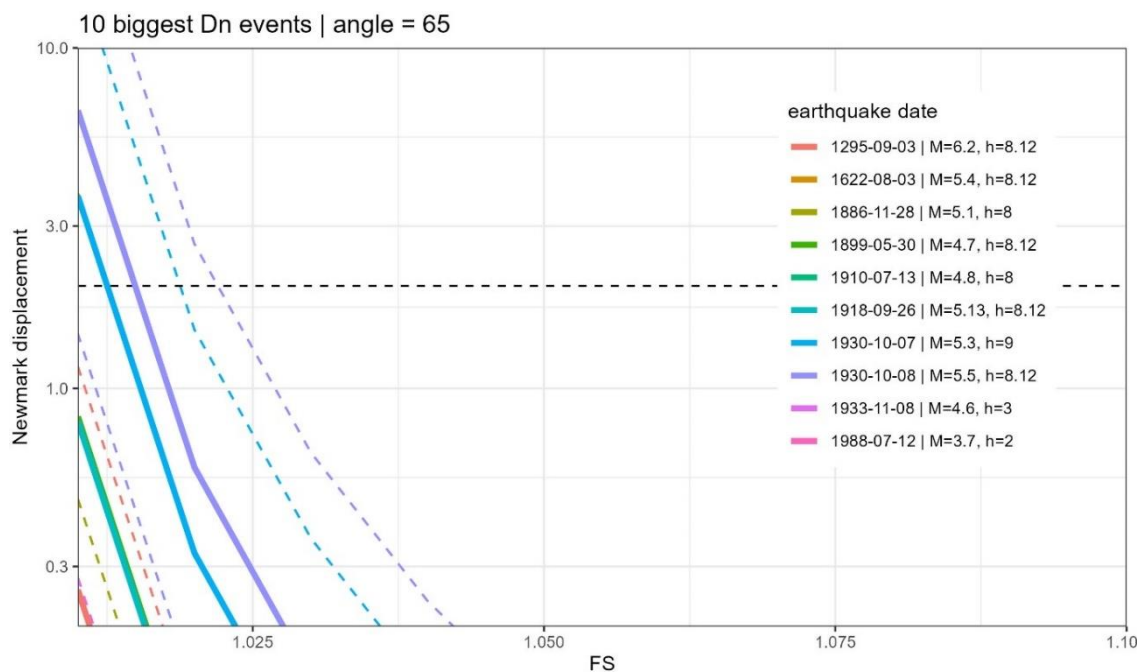

360 Fig. S 39: Theoretical Newmark displacement against Factor of Safety (FOS) of the 10 events with the biggest Newmark displacement for a slope angle of 65°. Dashed lines mark uncertainty according to the formula. Displacements are only noteworthy for very low FOS.

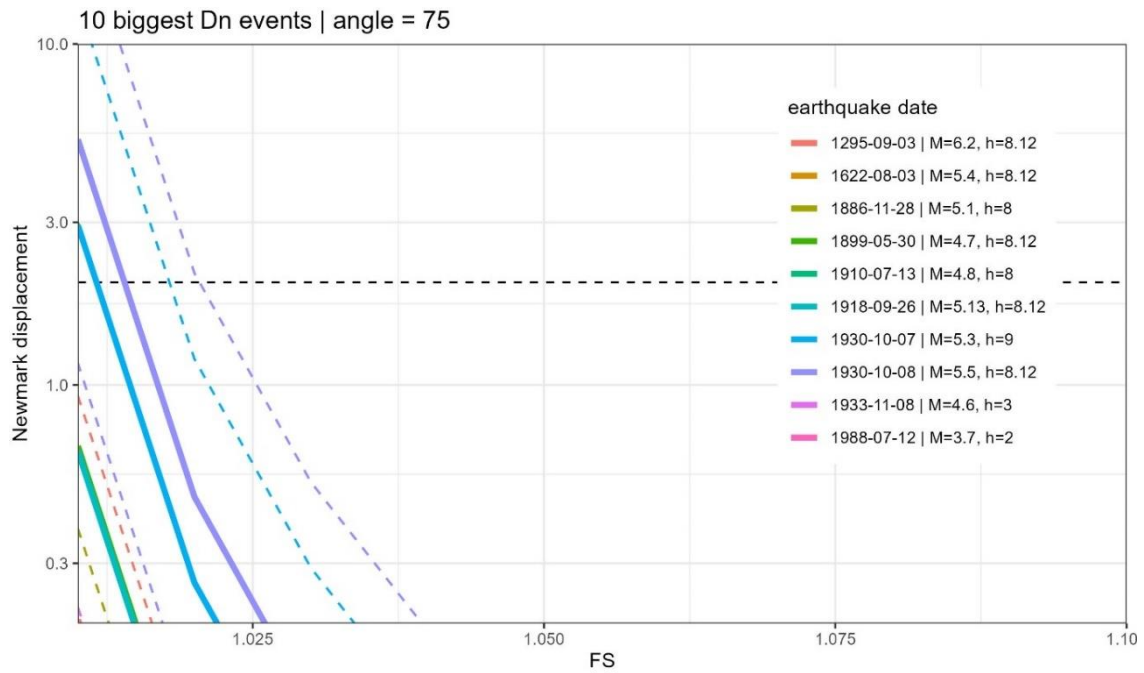

365

Fig. S 40: Theoretical Newmark displacement against Factor of Safety (FOS) of the 10 events with the biggest Newmark displacement for a slope angle of 75°. Dashed lines mark uncertainty according to the formula. Displacements are only noteworthy for very low FOS.

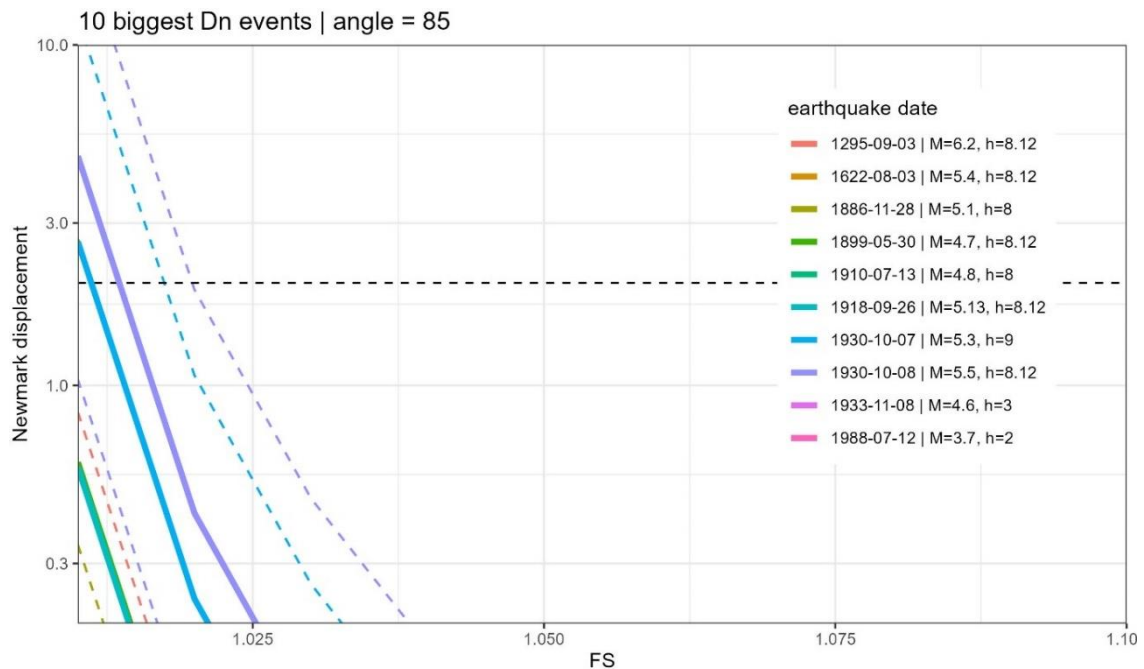

370

Fig. S 41: Theoretical Newmark displacement against Factor of Safety (FOS) of the 10 events with the biggest Newmark displacement for a slope angle of 85°. Dashed lines mark uncertainty according to the formula. Displacements are only noteworthy for very low FOS.



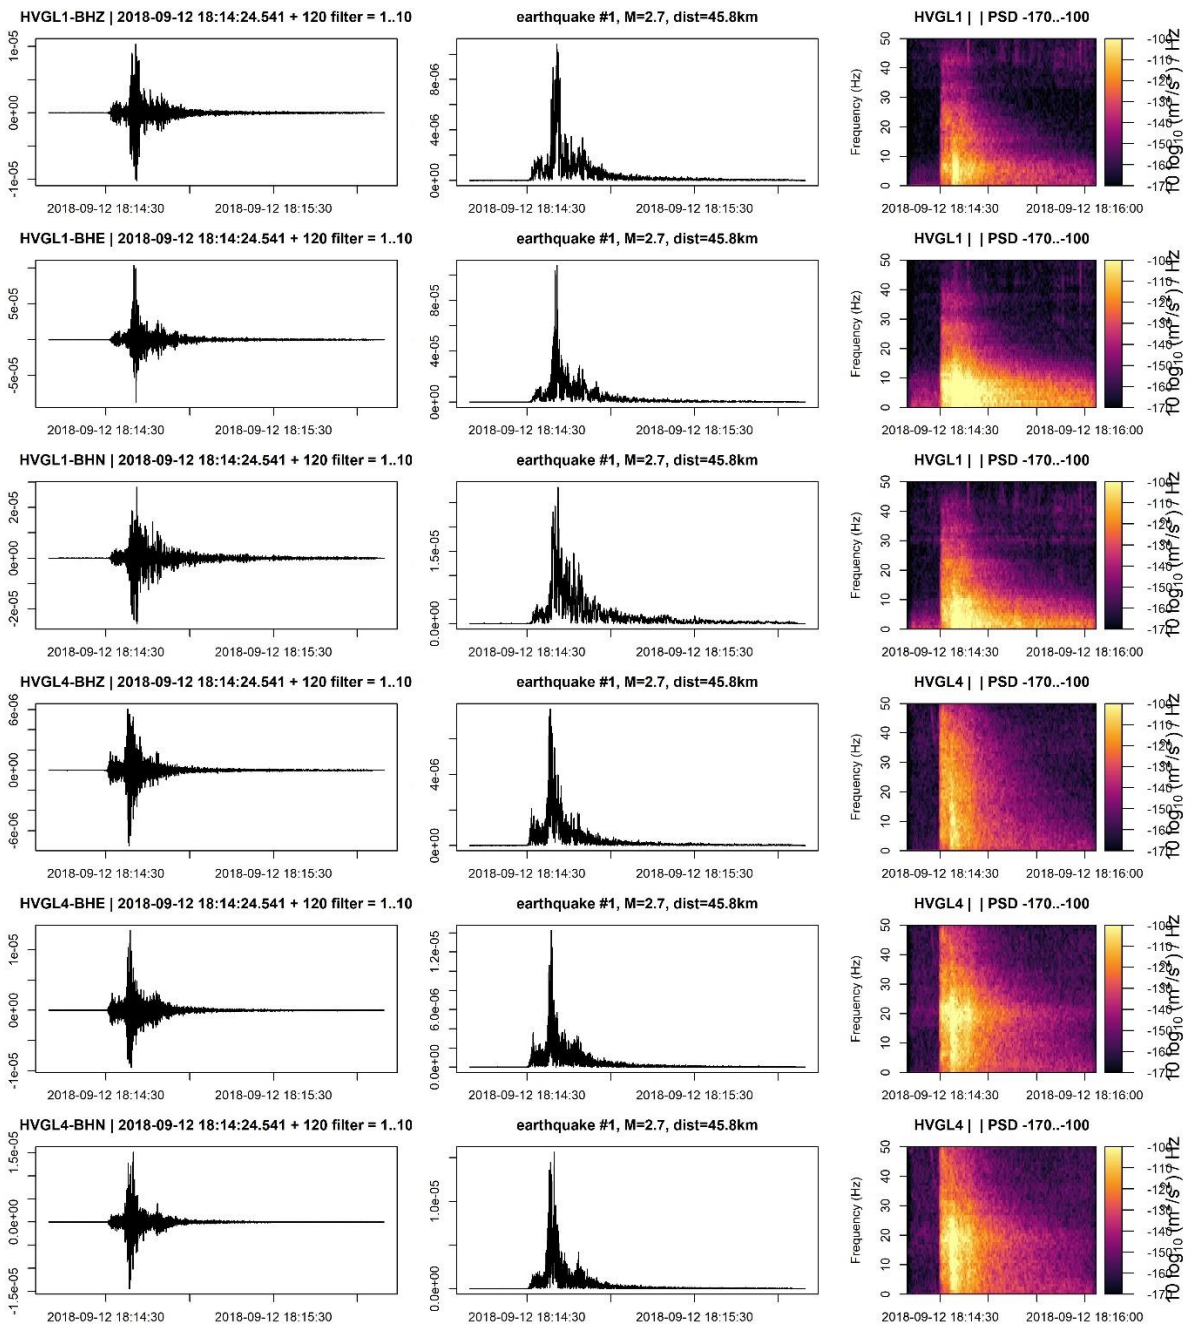

Fig. S 42: Example of measured seismic signal of HV1 at summit (top three rows) and HV4 in valley (bottom three rows) for all three components (top: Z, middle: E, bottom: N) for earthquake events 1 (left: seismogram, middle: envelope, right: spectrogram).
